# Supplementary material for: Evaluation of the coordination preferences and catalytic pathways of heteroaxial cobalt oximes towards hydrogen generation
Source: PubMed Central journal article supplement — Chem Sci. 2016 Feb 2;7(5):3264–78. doi: 10.1039/c5sc04214c (PMC6006490; doi:10.1039/c5sc04214c), 2016-02-02
Supplement: SC-007-C5SC04214C-s001.pdf [file SC-007-C5SC04214C-s001.pdf]

## Evaluation of the Coordination Preferences and Catalytic Pathways of Heteroaxial Cobalt Oximes towards Hydrogen Generation

Debashis Basu,<sup>a</sup> Shivnath Mazumder,<sup>a</sup> Jens Niklas,<sup>b</sup> Habib Baydoun,<sup>a</sup> Dakshika Wanniarachchi,<sup>a</sup> Xuetao Shi,<sup>a</sup> Richard J. Staples,<sup>c</sup> Oleg Poluektov,<sup>b</sup> H. Bernhard Schlegel,<sup>a\*</sup> Claudio N. Verani<sup>a\*</sup>

<sup>a</sup>Department of Chemistry, Wayne State University - Detroit, MI 48202

<sup>b</sup>Chemistry Division, Argonne National Laboratory - Argonne, IL 60439

<sup>c</sup>Department of Chemistry, Michigan State University - Lansing, MI 48824

e-mail: cnverani@chem.wayne.edu

### Table of Contents

**Figure S1.** Synthetic schemes of complexes **1**, **2**, and **3**

**Figure S2.** Experimental (bars) and simulated (line) isotopic distribution for the molecular ions of complexes **1-3**

**Figure S3.** Cyclic voltammograms of **1** in coordinating (CH<sub>3</sub>CN) versus in a non-coordinating (CH<sub>2</sub>Cl<sub>2</sub>) solvent

**Figure S4.** UV-Visible Spectra of **1-3** ([C] = 1.0 × 10<sup>-5</sup> M) in acetonitrile

**Table S1.** Calculated electronic energy difference between high-spin and low-spin configurations of several [Co<sup>I</sup>(L')(prdioXH)], [Co<sup>II</sup>(L')(prdioXH)]<sup>+</sup> and [Co<sup>II</sup>(L')(Cl)(prdioXH)] species (L' = 4-tBu<sub>4</sub>py, 4-Pyr<sub>4</sub>py, 4-Bz<sub>4</sub>py)

**Figure S5.** Change of Cyclic voltammogram of **1** upon addition of 1 equivalent of Et<sub>4</sub>NCl and 4-tBu<sub>4</sub>pyridine in CH<sub>3</sub>CN

**Figure S6.** Cyclic voltammetric experiments for dihydrogen generation with complex **2**

**Figure S7.** Cyclic voltammetric experiments for dihydrogen generation with complex **3**

**Figure S8.** Cyclic voltammetric experiments for dihydrogen generation with the blank

**Figure S9.** Plot of charge versus time during bulk-electrolysis experiment of **1** after 1h

**Figure S10.** Plots of charge versus time during bulk-electrolysis experiments of **2** and **3** after 1h

**Figure S11.** Redox non-innocence of the oxime ligand during the reduction of [Co<sup>II</sup>(4-tBu<sub>4</sub>py)(prdioXH)]<sup>+</sup>

**Table S2.** Dependence of the relative energy of the closed-shell and open-shell electronic States of [Co<sup>I</sup>(4-tBu<sub>4</sub>py)(prdioXH)] on the functional used

**Scheme S1.** Synthesis and characterization of [Co<sup>III</sup>(prdioXH)(4-tBu<sub>4</sub>py)<sub>2</sub>](PF<sub>6</sub>)<sub>2</sub>

**Scheme S2.** Synthesis and characterization of [Co<sup>III</sup>(prdioXH)(Cl)<sub>2</sub>]

**Figure S12.** <sup>1</sup>H-NMR spectra of the Co<sup>I</sup>-complex, [Co<sup>I</sup>(prdioXH)(4-tBu<sub>4</sub>py)], in CD<sub>3</sub>CN.

**Figure S13.** The full spectra for <sup>1</sup>H-NMR experiments of **1** in CD<sub>3</sub>CN upon addition of 4-tBu<sub>4</sub>pyridine, Et<sub>3</sub>N, and Et<sub>4</sub>NCl.

Energetics of addition of CH<sub>3</sub>CN to [Co<sup>II</sup>(4-tBu<sub>4</sub>py)(prdioXH)]<sup>+</sup>

**Table S3.** Crystallographic information for complexes **1**, **3**, **4**<sub>dimer</sub>, and [Co<sup>III</sup>(prdioXH)(4-tBu<sub>4</sub>py)<sub>2</sub>](PF<sub>6</sub>)<sub>2</sub>

**Table S4:** Cartesian coordinates of the computed structures

Figure S1. Synthetic schemes of complexes 1, 2, and 3.

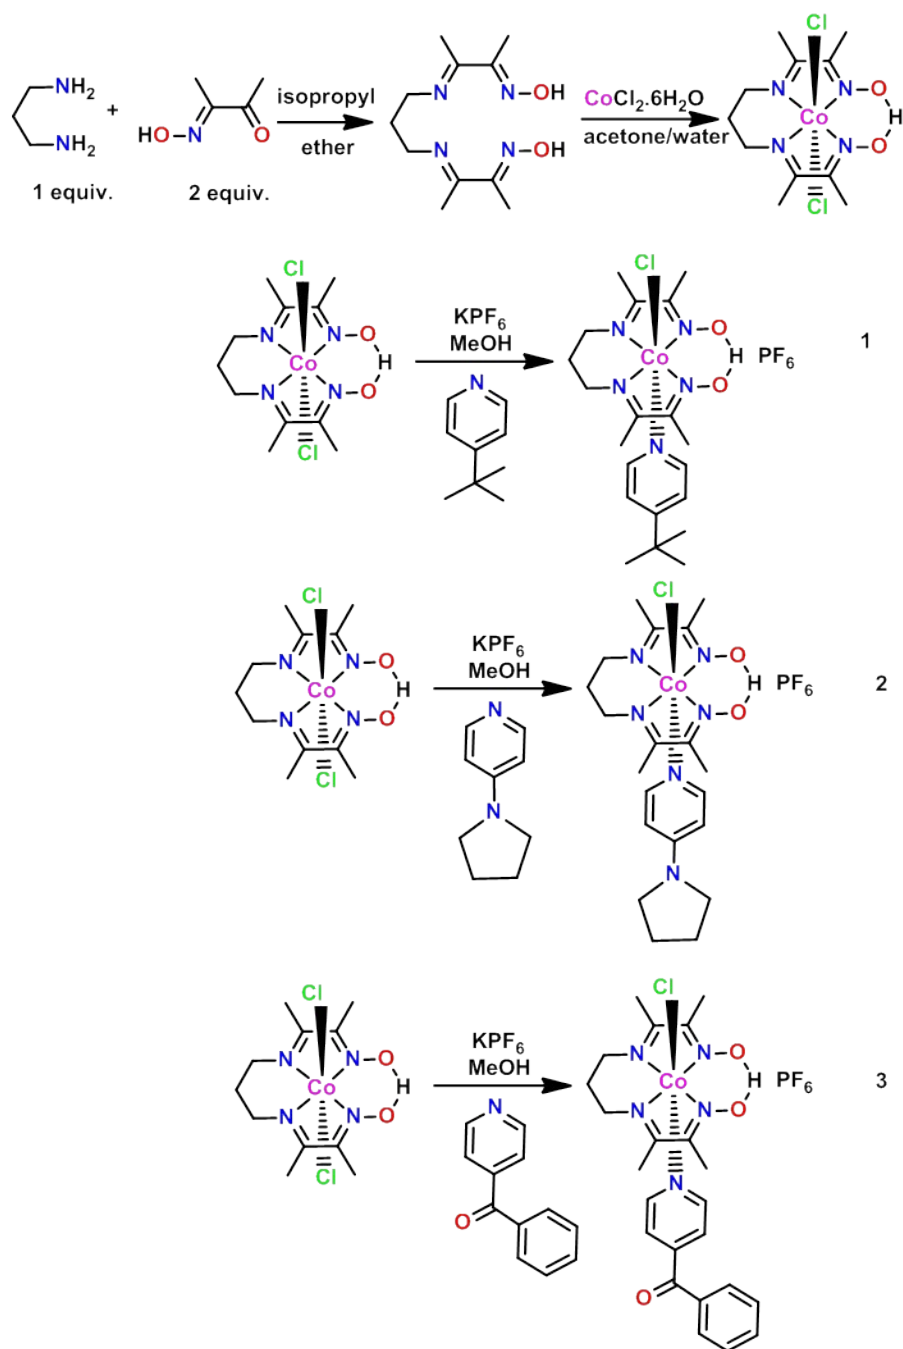

**Figure S2.** Experimental (bars) and simulated (line) isotopic distribution for the molecular ions of complexes **1-3** (left to right) [ESI-Mass spectra of **1-3** in CH<sub>3</sub>OH: [M<sup>+</sup>]<sup>+</sup>].

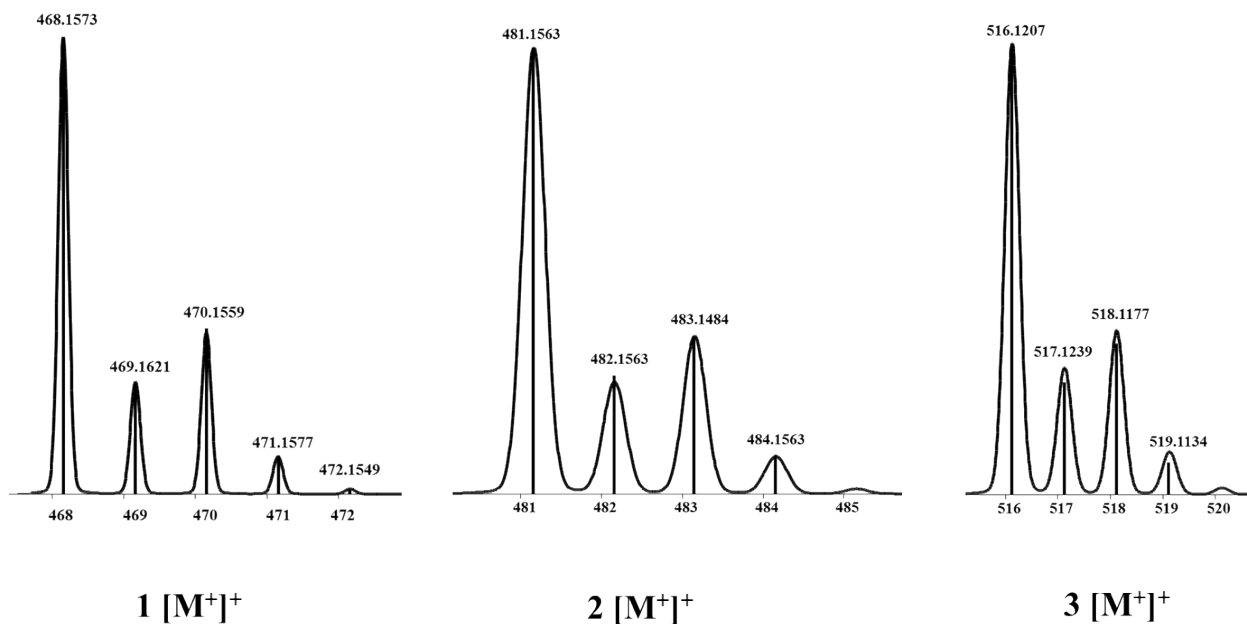

**Figure S3.** Cyclic voltammograms of **1** in coordinating (CH<sub>3</sub>CN) versus in a non-coordinating (CH<sub>2</sub>Cl<sub>2</sub>) solvent. The redox processes undergo cathodic shift in CH<sub>2</sub>Cl<sub>2</sub>.

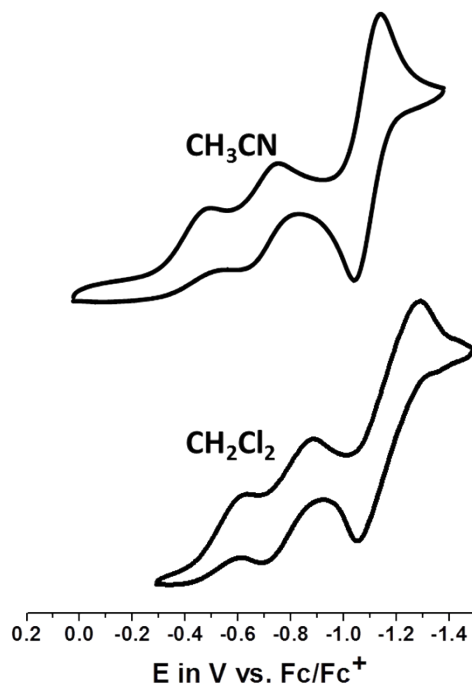

**Figure S4.** UV-Visible Spectra of **1-3** ( $[C] = 1.0 \times 10^{-5} \text{ M}$ ) in acetonitrile.

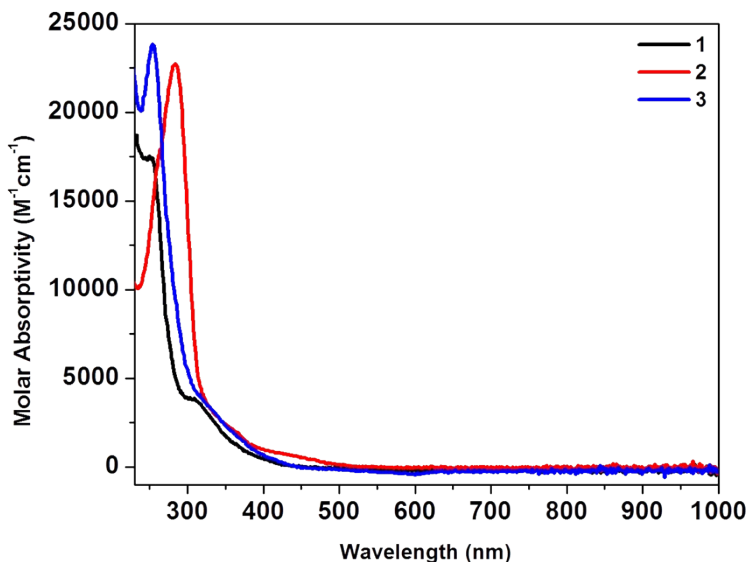

**Table S1.** Calculated electronic energy difference between high-spin and low-spin configurations of several  $[\text{Co}^{\text{I}}(\text{L}')(\text{prdioXH})]$ ,  $[\text{Co}^{\text{II}}(\text{L}')(\text{prdioXH})]^+$  and  $[\text{Co}^{\text{II}}(\text{L}')(\text{Cl})(\text{prdioXH})]$  species ( $\text{L}' = 4\text{-tBuPy}, 4\text{-PyrPy}, 4\text{-BzPy}$ )

| Species                                                            | $\Delta E_{\text{SCF}}(\text{Low spin} - \text{High spin})$ (kcal/mol) |
|--------------------------------------------------------------------|------------------------------------------------------------------------|
| $\text{Co}^{\text{I}}(4\text{-tBuPy})(\text{prdioXH})$             | -6.5                                                                   |
| $\text{Co}^{\text{I}}(4\text{-BzPy})(\text{prdioXH})$              | -3.4                                                                   |
| $\text{Co}^{\text{I}}(4\text{-PyrPy})(\text{prdioXH})$             | -7.2                                                                   |
| $\text{Co}^{\text{II}}(4\text{-tBuPy})(\text{prdioXH})$            | -7.0                                                                   |
| $\text{Co}^{\text{II}}(4\text{-BzPy})(\text{prdioXH})$             | -7.6                                                                   |
| $\text{Co}^{\text{II}}(4\text{-PyrPy})(\text{prdioXH})$            | -5.3                                                                   |
| $\text{Co}^{\text{II}}(\text{Cl})(\text{prdioXH})$                 | -5.8                                                                   |
| $\text{Co}^{\text{II}}(4\text{-tBuPy})(\text{Cl})(\text{prdioXH})$ | -7.2                                                                   |
| $\text{Co}^{\text{II}}(4\text{-BzPy})(\text{Cl})(\text{prdioXH})$  | -7.4                                                                   |
| $\text{Co}^{\text{II}}(4\text{-PyrPy})(\text{Cl})(\text{prdioXH})$ | -6.2                                                                   |
| $\text{Co}^{\text{II}}(\text{Cl})_2(\text{prdioXH})$               | -7.3                                                                   |

**Figure S5.** Change of Cyclic voltammogram of **1** upon addition of 1 equivalent of  $\text{Et}_4\text{NCl}$  and  $4\text{-tBuPyridine}$  in  $\text{CH}_3\text{CN}$ .

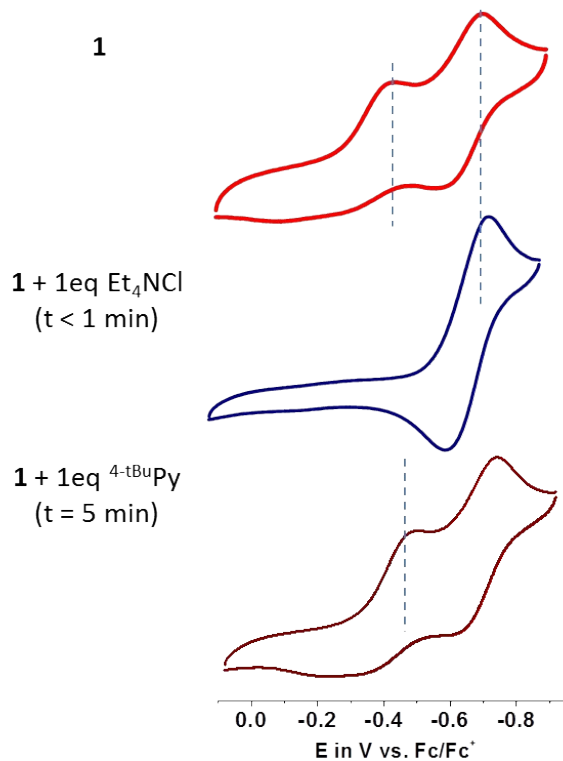

**Figure S6.** Cyclic voltammetric experiments for hydrogen generation with complex **2**.

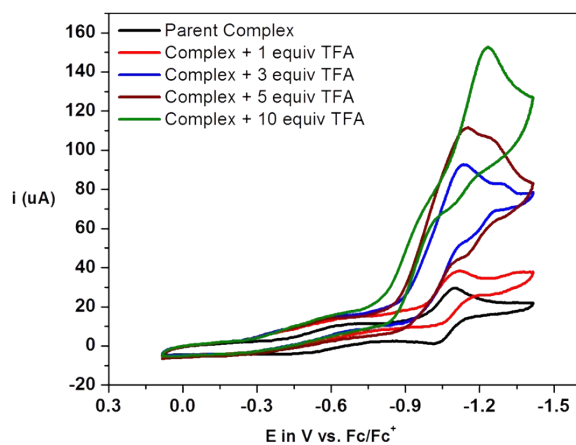

**Figure S7.** Cyclic voltammetric experiments for hydrogen generation with complex **3**.

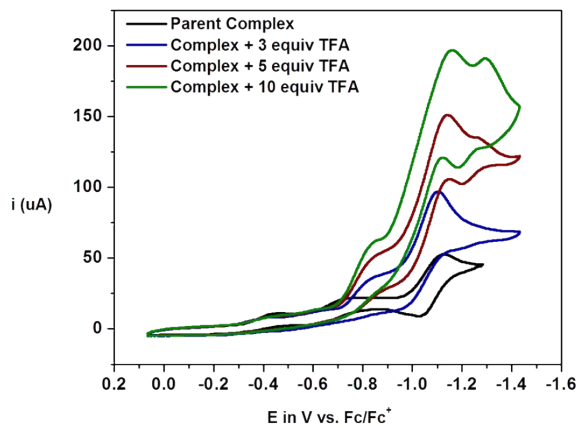

**Figure S8.** Cyclic voltammetric experiments for dihydrogen generation with the blank

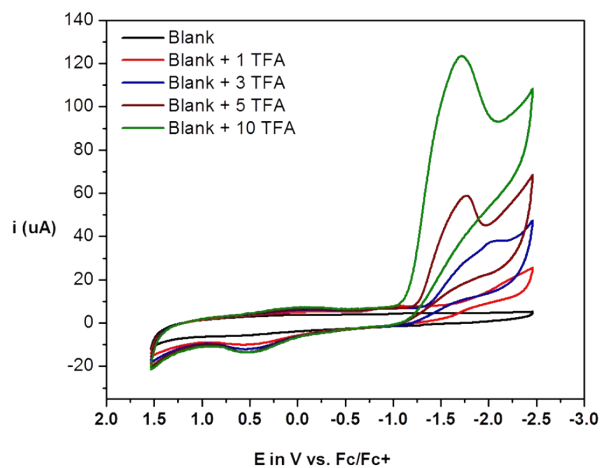

**Figure S9.** Plot of charge *versus* time during bulk-electrolysis experiment of **1** after 1h.

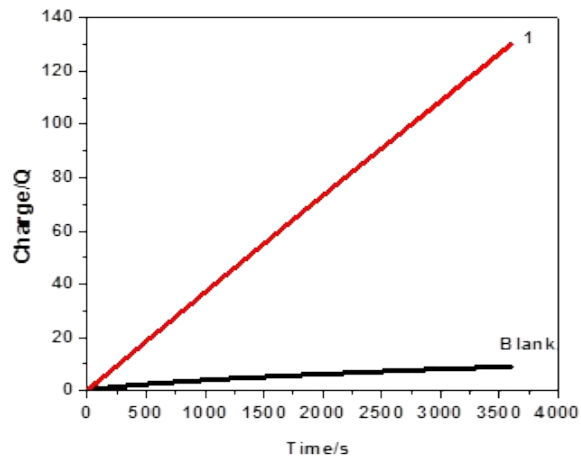

**Figure S10.** Plots of charge versus time during bulk-electrolysis experiments of **2** and **3** after 1h.

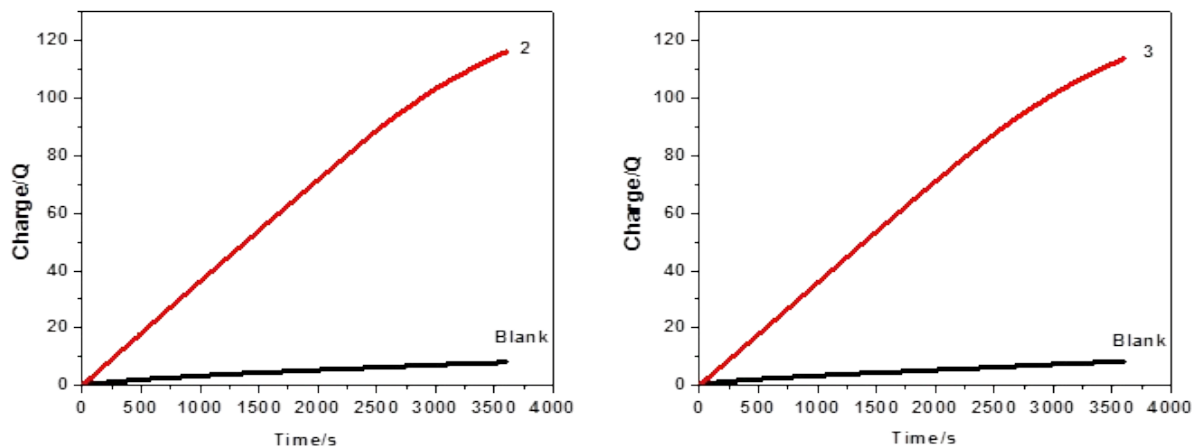

**Figure S11.** Redox non-innocence of the oxime ligand during the reduction of  $[\text{Co}^{\text{II}}(4\text{-tBuPy})(\text{prdioXH})]^+$ . Mulliken spin density analysis **i** and spin density plot **ii** for the complex. The hydrogen atoms are omitted for clarity in the spin density plot **ii**.

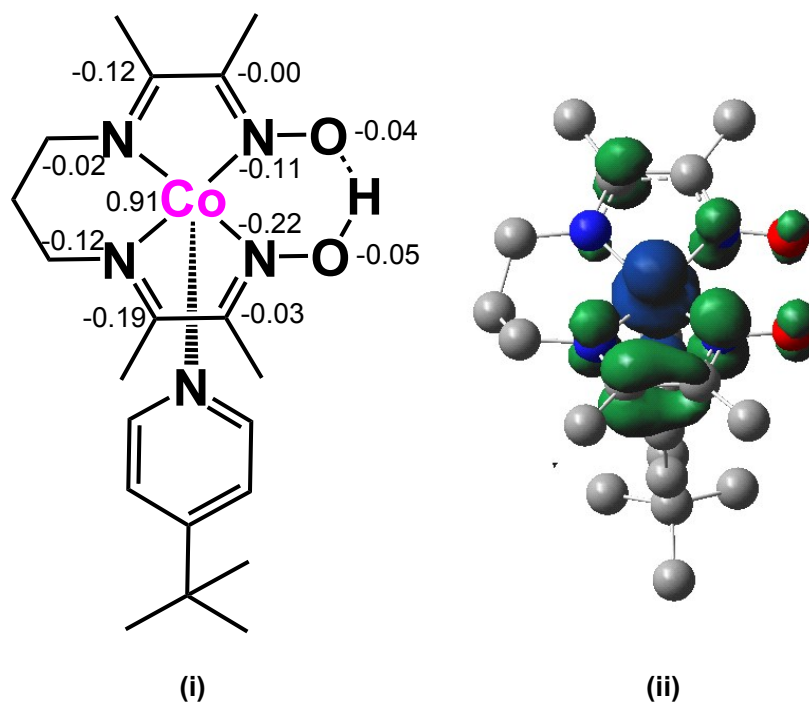

Calculations found that the reduction of  $[\text{Co}^{\text{II}}(4\text{-tBuPy})(\text{prdioXH})]^+$  complex may have significant degree of redox non-innocence character displayed by the oxime ligand as the resulting metal-reduced, closed-shell ( $S=0$ ),  $3d^8$   $\text{Co}^{\text{I}}$ -complex,  $[\text{Co}^{\text{I}}(4\text{-tBuPy})(\text{prdioXH})]$ , is 3.7 kcal/mol higher in energy than the ligand-

reduced, open-shell ( $S=0$ ),  $3d^7$  Co<sup>II</sup>-complex, [Co<sup>II</sup>(<sup>4-tBu</sup>py)(prdioH<sup>\*</sup>)]. As illustrated in **Figure S6**, spin density analysis of [Co<sup>II</sup>(<sup>4-tBu</sup>py)(prdioH<sup>\*</sup>)] complex shows that the total spin on the cobalt center is +0.91 while it is -0.90 on the imine-oxime ligand framework confirming the electronic state of the complex as open-shell [Co<sup>II</sup>(<sup>4-tBu</sup>py)(prdioH<sup>\*</sup>)]. The two unpaired electrons on the cobalt center and imine-oxime ligand HL are antiferromagnetically coupled as shown by the spin density plot (blue and green) in **ii** giving rise to an overall singlet ( $S=0$ ) state. However, the EPR experiment (**Figure 8d**) demonstrated a silent spectrum that is characteristic of an overall singlet state ( $S=0$ ) and failed to distinguish between the closed-shell and open-shell configurations of the species obtained from the reduction of [Co<sup>II</sup>(<sup>4-tBu</sup>py)(prdioH)]<sup>+</sup>. When we reevaluated the energy difference of these two configurations with different functionals, it was found that the energy difference between the two electronic states is dependent on the functional used and hybrid functionals favor the open-shell configuration while the pure functionals predict the two configurations to be isoenergetic (**Table S2**).

**Table S2. Dependence of the relative energy of the closed-shell and open-shell electronic states on the functional used**

| Functional used | [E(SCF)closed-shell - E(SCF)open-shell]<br>(kcal/mol) |
|-----------------|-------------------------------------------------------|
| B3PW91          | 3.25                                                  |
| B3LYP           | 4.23                                                  |
| M06             | 3.71                                                  |
| BP86            | -0.73                                                 |
| M06-L           | 0.09                                                  |



### Scheme S1. Synthesis and characterization of $[\text{Co}^{\text{III}}(\text{prdioXH})(^4\text{-tBuPy})_2](\text{PF}_6)_2$

$[\text{Co}^{\text{III}}(\text{prdioXH})(^4\text{-tBuPy})_2](\text{PF}_6)_2$ :  $[\text{Co}^{\text{III}}(\text{prdioXH})\text{Br}_2]$  was synthesized from  $[\text{Co}^{\text{III}}(\text{prdioXH})\text{Cl}_2]$  by following literature procedure.<sup>1,2</sup>  $[\text{Co}^{\text{III}}(\text{prdioXH})\text{Br}_2]$  (1 mmol, 0.458 g) was dissolved in 20 mL methanol.  $\text{AgNO}_3$  (2 mmol, 0.34 g) in 10 mL of methanol was added to the methanol solution of  $[\text{Co}^{\text{III}}(\text{prdioXH})\text{Br}_2]$ . The solution was stirred for 2 hours and the greyish white precipitate of  $\text{AgBr}$  was removed upon filtration.  $^4\text{-tBuPyridine}$  (2 mmol, 0.27 g) in 5 mL of methanol was added to the solution followed by  $\text{KPF}_6$  (3.4 mmol, 0.6256 g) in 10 mL of water. The reaction mixture was stirred for 2 hours and then, rotary-evaporated to 10 mL. This solution was kept for 3-4 days and brownish-yellow precipitate was generated. X-ray quality crystals were obtained after recrystallization from methanol/water (2:1) mixture. Yield: 80 %. IR (KBr,  $\text{cm}^{-1}$ ) 3671 (w) (OH); 3246 (w), 3149 (w), 3106 (w) (Aromatic-CH); 2971 (s), 2911 (m), 2875 (w) (t-butyl and other aliphatic CH); 1621 (s), 1508 (m) (C=N); 1436 (m) (C=C); 822 (s) ( $\text{PF}_6^-$ ).  $^1\text{H-NMR}$  [400MHz,  $\text{CD}_3\text{CN}$ , 300K]  $\delta/\text{ppm}$  = 1.278 [s, 18H (t-butyl)]; 2.458 [m, 2H ( $\text{CH}_2$ )]; 2.556 [s, 6H ( $\text{CH}_3$ )]; 2.692 [s, 6H ( $\text{CH}_3$ )]; 4.262 [t, 4H ( $\text{CH}_2$ )]; 7.411 [s, 8H (aryl)]. ESI pos. in MeOH:  $m/z$  = 713.2578 for  $[\text{Co}^{\text{III}}(\text{prdioXH})(^4\text{-tBuPy})_2] + \text{PF}_6^-$ . Anal. Calcd for  $\text{C}_{29}\text{H}_{45}\text{CoF}_{12}\text{N}_6\text{O}_2\text{P}_2$ : C: 40.57; H: 5.28; N: 9.79; Found: C: 40.49; H: 5.19; N: 9.91.

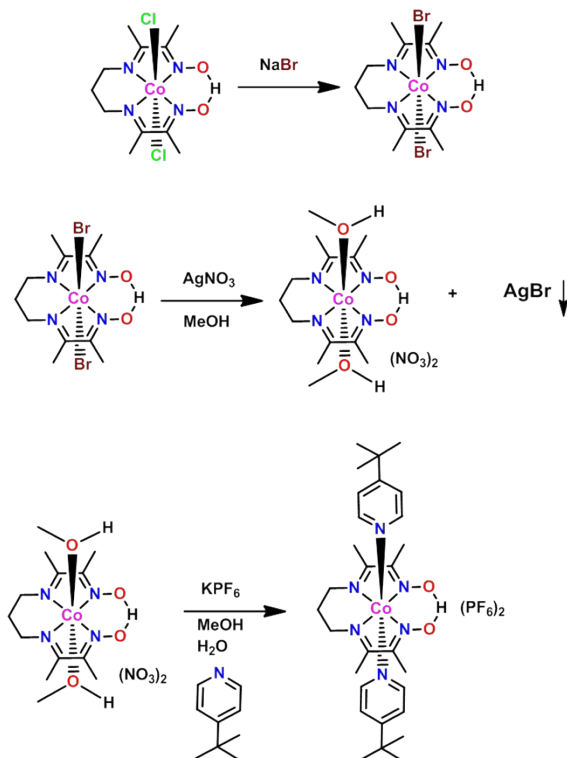

1. R. Hay and R. Bradshaw, *Trans. Met. Chem.*, 1996, **21**, 64.
2. P. A. Jacques, V. Artero, J. Pecaut and M. Fontecave, *Proc. Nat. Acad. Sci.*, 2009, **106**, 20627.

### Associated files to Scheme S1

(a)  $^1\text{H-NMR}$  spectrum of  $[\text{Co}^{\text{III}}(\text{prdioXH})(^4\text{-tBuPy})_2](\text{PF}_6)_2$  in  $\text{CD}_3\text{CN}$ , and (b) ESI-MS spectrum in  $\text{CH}_3\text{OH}$

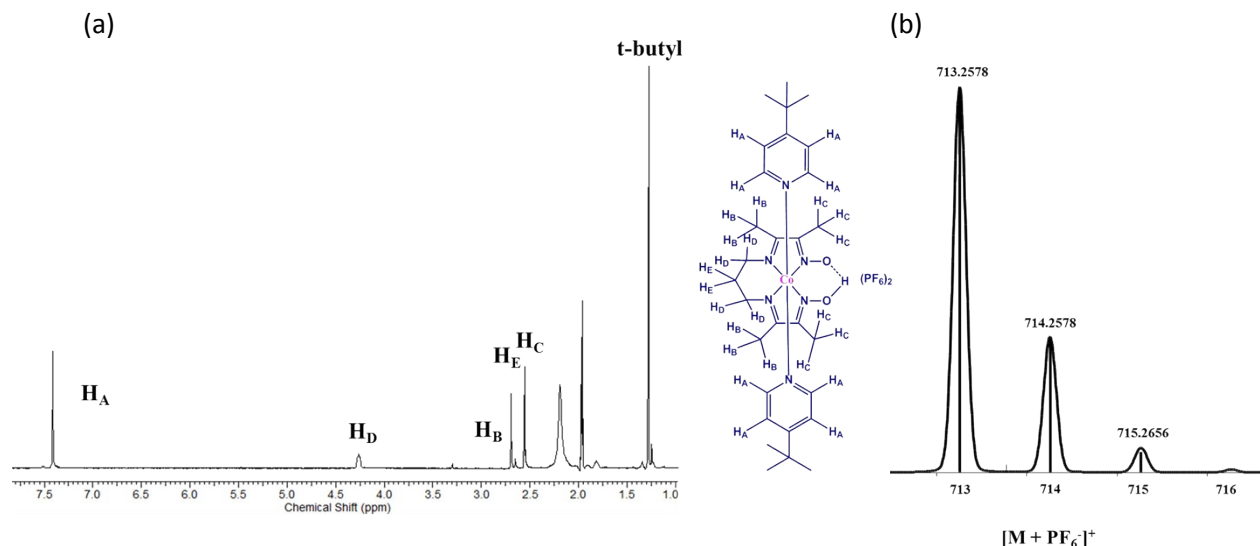

**(c) Crystallographic description:** An orange block crystal with dimensions 0.28 x 0.16 x 0.15 mm was mounted on a Nylon loop using very small amount of paratone oil.

Data were collected using a Bruker CCD (charge coupled device) based diffractometer equipped with an Oxford Cryostream low-temperature apparatus operating at 173 K. Data were measured using omega and phi scans of  $0.5^\circ$  per frame for 20 s. The total number of images was based on results from the program COSMO<sup>3</sup> where redundancy was expected to be 4.0 and completeness of 100% out to 0.83 Å. Cell parameters were retrieved using APEX II software<sup>4</sup> and refined using SAINT on all observed reflections. Data reduction was performed using the SAINT software<sup>5</sup> which corrects for Lp. Scaling and absorption corrections were applied using SADABS<sup>6</sup> multi-scan technique, supplied by George Sheldrick. The structures are solved by the direct method using the SHELXS-97 program and refined by least squares method on  $F^2$ , SHELXL-97, which are incorporated in SHELXTL-PC V 6.10.<sup>7</sup>

The structure was solved in the space group  $P2_1/n$  (# 14). All non-hydrogen atoms are refined anisotropically. Hydrogens were calculated by geometrical methods and refined as a riding model except for the hydrogen located near atom O1 and atom O2 which was found and refined isotropically. The crystal used for the diffraction study showed no decomposition during data collection. All drawings are done at 50% ellipsoids.

3. COSMO V1.61, *Software for the CCD Detector Systems for Determining Data Collection Parameters*. Bruker Analytical X-ray Systems, Madison, WI (2009).

4. APEX2 V2010.11-3. *Software for the CCD Detector System*; Bruker Analytical X-ray Systems, Madison, WI (2010).

5. SAINT V 7.68A Software *for the Integration of CCD Detector System* Bruker Analytical X-ray Systems, Madison, WI (2010).
6. SADABS V2.008/2 Program for absorption corrections using Bruker-AXS CCD based on the method of Robert Blessing; Blessing, R.H. *Acta Cryst.* A51, 1995, 33-38.
7. Sheldrick, G.M. "A short history of SHELX". *Acta Cryst.* A64, 2008, 112-122.

(d) ORTEP representation of  $[\text{Co}^{\text{III}}(\text{prdioXH})(^{4\text{-tBu}}\text{py})_2](\text{PF}_6)_2$  (CCDC 1449138) with 50% ellipsoidal probability and selected bond-lengths (Å).

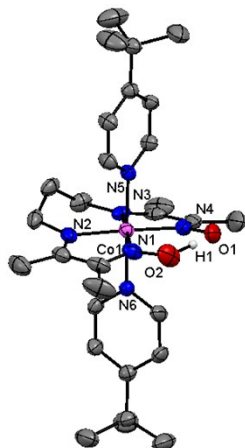

|            |         |
|------------|---------|
| Co(1)-N(1) | 1.901 Å |
| Co(1)-N(2) | 1.915 Å |
| Co(1)-N(3) | 1.912 Å |
| Co(1)-N(4) | 1.886 Å |
| Co(1)-N(5) | 1.973 Å |
| Co(1)-N(6) | 1.977 Å |

#### Scheme S2. Synthesis and characterization of $[\text{Co}^{\text{III}}(\text{prdioXH})(\text{Cl})_2]$

$[\text{Co}^{\text{III}}(\text{prdioXH})(\text{Cl})_2]$ : This synthesis was performed by following a literature procedure of the reaction of ligand,  $\text{prdioXH}_2$ , with  $\text{CoCl}_2 \cdot 6\text{H}_2\text{O}$  in acetone/water (9:1) mixture.<sup>8</sup> The ligand  $\text{H}_2\text{L}^{\text{oxime}}$  (1 mmol, 0.24 g) was dissolved in 45 mL of acetone in a 100 mL round-bottom flask. A solution of  $\text{CoCl}_2 \cdot 6\text{H}_2\text{O}$  (1 mmol, 0.24 g) in 5 mL water was slowly added to the stirring solution of the ligand. The reaction was stirred for three hours in aerobic condition. A brown precipitate was obtained which was discarded to get a green colored filtrate. Green colored crystals were obtained from the filtrate after few days of slow evaporation. Yield: 70 %. IR (KBr,  $\text{cm}^{-1}$ ) 3446 (w) (OH); 1618 (m) (C=N); 1143 (m) (N-O).  $^1\text{H-NMR}$  [400 MHz,  $\text{CD}_3\text{CN}$ , 300K]  $\delta/\text{ppm}$  = 2.55 [m, 2H ( $\text{CH}_2$ )]; 2.62 [s, 6H ( $\text{CH}_3$ )]; 2.68 [s, 6H ( $\text{CH}_3$ )]; 4.18 [t, 4H ( $\text{CH}_2$ )]. ESI pos. in MeOH:  $m/z$  = 333.0529 for  $[\text{Co}^{\text{III}}(\text{prdioXH})(\text{Cl})]^+$ . Anal. Calcd for  $\text{C}_{11}\text{H}_{19}\text{Cl}_2\text{CoN}_4\text{O}_2$ : C: 35.79; H: 5.19; N: 15.18; Found: C: 35.75; H: 5.07; N: 15.16.

8) G. Costa, G. Mestroni and E. D. Savorgnani, *Inorg. Chim. Acta*, 1969, 323.

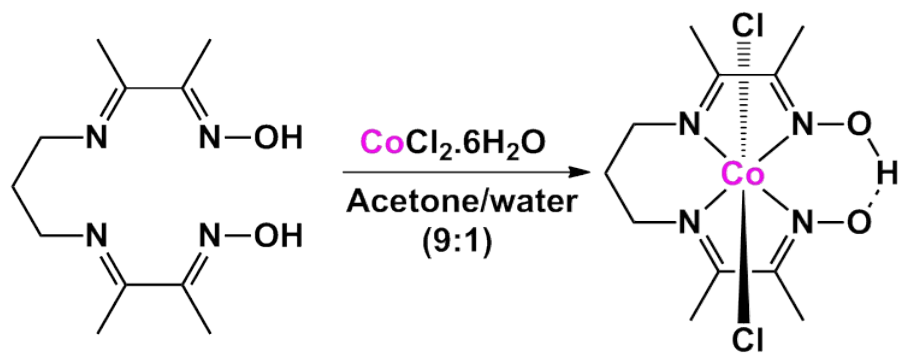

**Figure S12.**  $^1\text{H-NMR}$  spectrum of the  $\text{Co}^{\text{I}}$ -complex,  $[\text{Co}^{\text{I}}(\text{prdioXH})(^4\text{tBuPy})]$ , in  $\text{CD}_3\text{CN}$ .

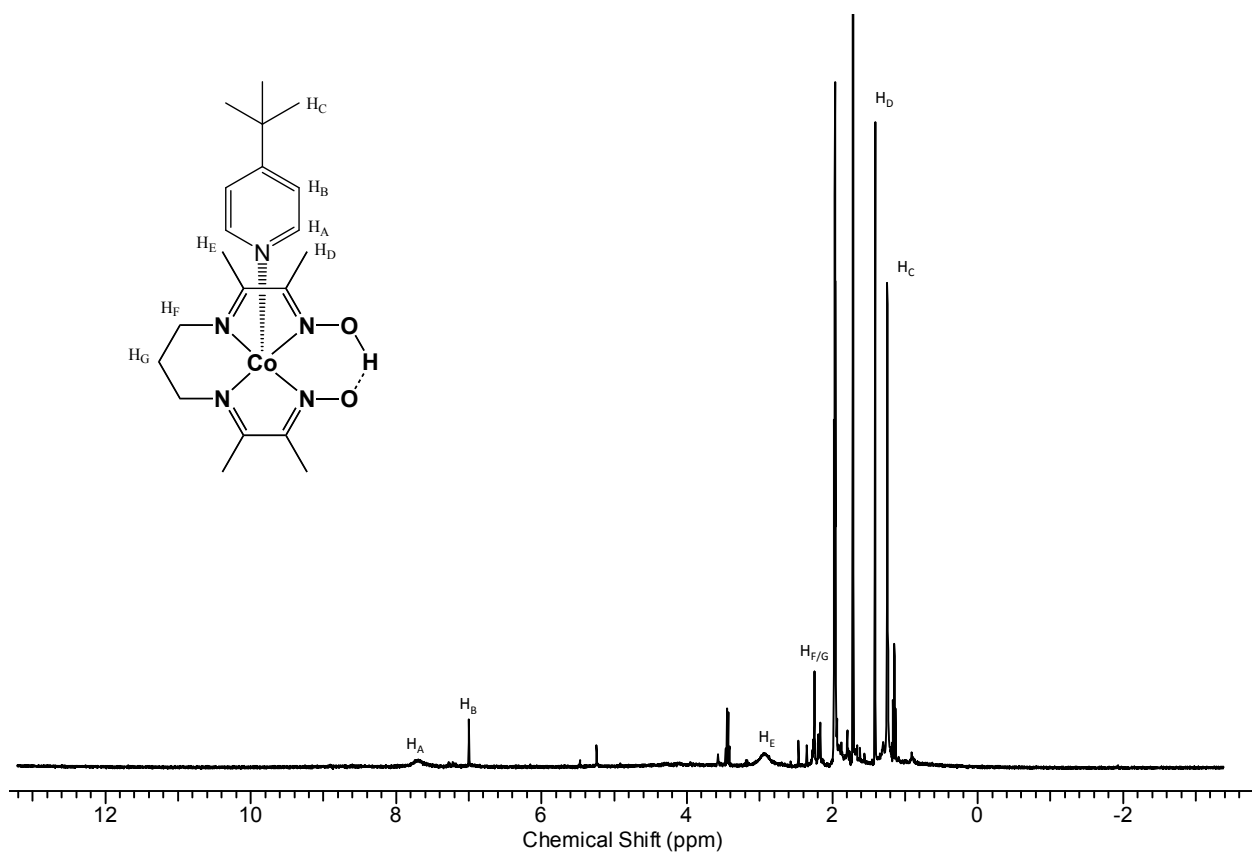

**Figure S13.** The full spectra for  $^1\text{H}$ -NMR experiments of **1** in  $\text{CD}_3\text{CN}$  upon addition of  $^t\text{Bu}$ pyridine,  $\text{Et}_3\text{N}$ , and  $\text{Et}_4\text{NCl}$ .

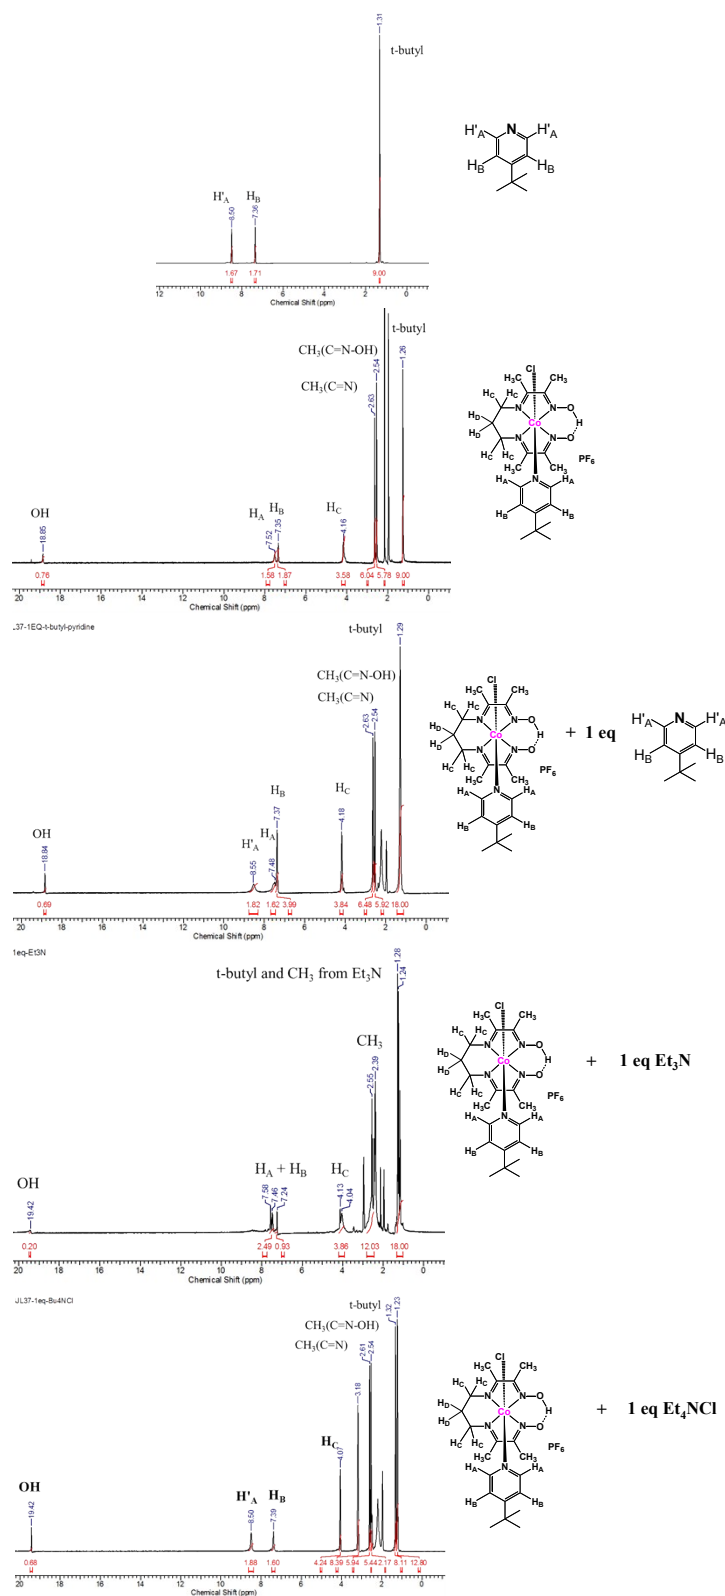

## Energetics of addition of CH<sub>3</sub>CN to [Co<sup>II</sup>(<sup>4-t</sup>Bu<sub>3</sub>py)(prdioH)]<sup>+</sup>

Coordination of CH<sub>3</sub>CN to the five-coordinate [Co<sup>II</sup>(<sup>4-t</sup>Bu<sub>3</sub>py)(prdioH)]<sup>+</sup> species is calculated to be thermodynamically unfavorable by about 11 kcal/mol ( $\Delta G$ ), in good agreement with the literature,<sup>9</sup> however it may take place considering the large excess of CH<sub>3</sub>CN as solvent. Addition of CH<sub>3</sub>CN is calculated to be isoenergetic in terms of potential energy and there may be uncertainty in calculating the entropic contributions for association and dissociation reactions in solution.

9. A. Bhattacharjee, E. S. Andreiadis, M. C. Kerlidou, M. Fontecave, M. J. Field and V. Artero, *Chem. Eur. J.*, **2013**, *19*, 15166.

**Table S3.** Crystallographic information for complexes **1**, **3**, **4<sub>dimer</sub>**, and [Co<sup>III</sup>(prdioH)(<sup>4-t</sup>Bu<sub>3</sub>py)<sub>2</sub>](PF<sub>6</sub>)<sub>2</sub>

|                                            | <b>1</b>                                                                                         | <b>3</b>                                                                           | <b>4<sub>dimer</sub></b>                                        | [Co <sup>III</sup> (prdioH)( <sup>4-t</sup> Bu <sub>3</sub> py) <sub>2</sub> ](PF <sub>6</sub> ) <sub>2</sub> |
|--------------------------------------------|--------------------------------------------------------------------------------------------------|------------------------------------------------------------------------------------|-----------------------------------------------------------------|---------------------------------------------------------------------------------------------------------------|
| Empirical formula                          | C <sub>21</sub> H <sub>34</sub> Cl <sub>3</sub> CoF <sub>6</sub> N <sub>5</sub> O <sub>2</sub> P | C <sub>23</sub> H <sub>28</sub> ClCoF <sub>6</sub> N <sub>5</sub> O <sub>3</sub> P | C <sub>20</sub> H <sub>30</sub> CoN <sub>5</sub> O <sub>2</sub> | C <sub>30</sub> H <sub>49</sub> CoF <sub>12</sub> N <sub>6</sub> O <sub>3</sub> P <sub>2</sub>                |
| Formula weight                             | 698.78                                                                                           | 661.85                                                                             | 431.42                                                          | 890.62                                                                                                        |
| Temperature (K)                            | 173(2)                                                                                           | 173.15                                                                             | 100.1                                                           | 173(2) K                                                                                                      |
| Wavelength (Å)                             | 0.71073                                                                                          | 0.71073                                                                            | 0.71073                                                         | 0.71073                                                                                                       |
| Crystal system, space group                | Tetragonal, I -4                                                                                 | Monoclinic, P21/c                                                                  | Monoclinic, C2/c                                                | Monoclinic, P 21/n                                                                                            |
| a (Å)                                      | 28.715(4)                                                                                        | 6.9686(4)                                                                          | 14.9757(13)                                                     | 12.5242(14)                                                                                                   |
| b (Å)                                      | 28.715(4)                                                                                        | 22.9724(13)                                                                        | 10.6987(13)                                                     | 16.7919(19)                                                                                                   |
| c (Å)                                      | 7.0017(9)                                                                                        | 17.7667(12)                                                                        | 24.941(3)                                                       | 18.462(2)                                                                                                     |
| $\alpha$ (°)                               | 90                                                                                               | 90                                                                                 | 90                                                              | 90                                                                                                            |
| $\beta$ (°)                                | 90                                                                                               | 96.4950(10)                                                                        | 98.286(8)                                                       | 91.4660(10)                                                                                                   |
| $\gamma$ (°)                               | 90                                                                                               | 90                                                                                 | 90                                                              | 90                                                                                                            |
| Volume (Å <sup>3</sup> )                   | 5773.5(13)                                                                                       | 2825.9(3)                                                                          | 3954.3(7)                                                       | 3881.4(8)                                                                                                     |
| Z                                          | 8                                                                                                | 4                                                                                  | 8                                                               | 4                                                                                                             |
| Calculated density (Mg/m <sup>3</sup> )    | 1.608                                                                                            | 1.556                                                                              | 1.449                                                           | 1.524                                                                                                         |
| Absorption coefficient (mm <sup>-1</sup> ) | 0.996                                                                                            | 0.833                                                                              | 0.895                                                           | 0.622                                                                                                         |
| F (000)                                    | 2864                                                                                             | 1352                                                                               | 1824                                                            | 1840                                                                                                          |
| R(F) (%)                                   | 3.55                                                                                             | 5.18                                                                               | 5.97                                                            | 5.79                                                                                                          |
| R <sub>w</sub> (F) (%)                     | 3.85                                                                                             | 7.88                                                                               | 15.31                                                           | 8.27                                                                                                          |
| CCDC number                                | 1434960                                                                                          | 1434959                                                                            | 1448834                                                         | 1449138                                                                                                       |

**Table S4: Cartesian coordinates of the optimized structures**

Co(<sup>4-tBu</sup>py)(prdioXH) (low-spin/open-shell)

|    |            |             |             |
|----|------------|-------------|-------------|
| Co | 1.38651000 | 0.00629000  | -0.13259900 |
| N  | 1.72667400 | 1.43924200  | 1.08374800  |
| N  | 1.76174000 | -1.41358900 | 1.08293100  |
| N  | 1.60092500 | -1.37824000 | -1.37840000 |
| N  | 1.53874100 | 1.39724800  | -1.40171300 |
| C  | 1.84471300 | 1.29618300  | 2.54271900  |
| C  | 1.86475800 | -1.26975100 | 2.54215400  |
| C  | 1.18874500 | 0.00846400  | 3.04452300  |
| H  | 2.91034300 | 1.29509800  | 2.82712600  |
| H  | 1.38247000 | 2.15413700  | 3.05022900  |
| H  | 1.23251500 | 0.00972800  | 4.14182500  |
| H  | 0.12984400 | 0.00084200  | 2.75768300  |
| H  | 1.40403600 | -2.12989500 | 3.04839200  |
| H  | 2.92601400 | -1.25720700 | 2.84608100  |
| C  | 1.75671400 | 2.63300800  | -0.92985500 |
| C  | 1.87823800 | 2.63808400  | 0.50997500  |
| C  | 1.82006300 | -2.62568400 | -0.91678100 |
| C  | 1.93201900 | -2.63219300 | 0.51272100  |
| C  | 1.87289000 | 3.84161300  | -1.81210000 |
| H  | 2.88446600 | 4.26818400  | -1.78300200 |
| H  | 1.65119200 | 3.55864600  | -2.84351400 |
| H  | 1.17489500 | 4.63151000  | -1.50854300 |
| C  | 2.17320800 | 3.89712500  | 1.28149600  |
| H  | 1.32840500 | 4.18163200  | 1.92378300  |
| H  | 3.04549400 | 3.76778900  | 1.93421700  |
| H  | 2.37629400 | 4.73280800  | 0.60922300  |
| C  | 1.93425100 | -3.79760400 | -1.84704700 |
| H  | 1.98757800 | -4.74348900 | -1.30356000 |
| H  | 1.07196400 | -3.83812500 | -2.52348200 |
| H  | 2.82807800 | -3.71663000 | -2.48023700 |
| C  | 2.24224700 | -3.86677100 | 1.31926500  |
| H  | 3.10567600 | -3.70397100 | 1.97714000  |
| H  | 1.39837700 | -4.15602800 | 1.96139500  |
| H  | 2.47366700 | -4.71797000 | 0.67608000  |
| O  | 1.39554800 | 1.20766700  | -2.75139700 |
| O  | 1.45209300 | -1.22694000 | -2.76261800 |

|   |             |             |             |
|---|-------------|-------------|-------------|
| H | 1.40074600  | -0.12539600 | -2.87140000 |
| C | -1.40010500 | 1.15560500  | -0.05073200 |
| C | -1.35718200 | -1.16411500 | -0.02099000 |
| C | -2.79525400 | 1.16764000  | -0.01045600 |
| H | -0.83441300 | 2.08019300  | -0.08035900 |
| C | -2.75509700 | -1.22678100 | 0.02107000  |
| H | -0.75762500 | -2.06800700 | -0.02634200 |
| C | -3.52214300 | -0.04446400 | 0.02746200  |
| H | -3.30228900 | 2.12698300  | -0.01000800 |
| H | -3.22575800 | -2.20220100 | 0.04779500  |
| N | -0.67650000 | 0.00664500  | -0.05638300 |
| C | -5.05664700 | -0.03533200 | 0.07012600  |
| C | -5.64780800 | -1.45966600 | 0.11540800  |
| H | -6.74189300 | -1.39659700 | 0.14567500  |
| H | -5.37330600 | -2.04399800 | -0.77159300 |
| H | -5.32126300 | -2.00811700 | 1.00772500  |
| C | -5.52474600 | 0.73332000  | 1.33444800  |
| H | -5.16156300 | 0.24506900  | 2.24720400  |
| H | -5.16923600 | 1.77008400  | 1.33668800  |
| H | -6.62095000 | 0.75439200  | 1.37000400  |
| C | -5.59400600 | 0.68151500  | -1.19720600 |
| H | -5.28341200 | 0.15381800  | -2.10733700 |
| H | -6.69050900 | 0.70523500  | -1.17196400 |
| H | -5.23695300 | 1.71552600  | -1.26311600 |

Co(<sup>4-tBu</sup>py)(prdioXH) (high-spin/open-shell)

|    |            |             |             |
|----|------------|-------------|-------------|
| Co | 1.46012300 | 0.00965400  | -0.13312300 |
| N  | 1.73052000 | 1.44843200  | 1.10438700  |
| N  | 1.71982600 | -1.43772900 | 1.09723100  |
| N  | 1.55617600 | -1.40193700 | -1.38203900 |
| N  | 1.54085600 | 1.42300500  | -1.39963700 |
| C  | 1.84509200 | 1.28497200  | 2.56106900  |
| C  | 1.83640100 | -1.28610600 | 2.55058500  |
| C  | 1.16748000 | 0.00052700  | 3.04680600  |
| H  | 2.91070700 | 1.26200800  | 2.84655600  |
| H  | 1.39723300 | 2.14588400  | 3.07611700  |
| H  | 1.19461900 | 0.00028400  | 4.14480200  |
| H  | 0.11367300 | 0.00578200  | 2.74195900  |
| H  | 1.37331600 | -2.14011800 | 3.06687300  |

|   |             |             |             |                                                                      |             |             |             |
|---|-------------|-------------|-------------|----------------------------------------------------------------------|-------------|-------------|-------------|
| H | 2.89849300  | -1.27349600 | 2.86005200  | C                                                                    | -5.58435800 | 0.76849600  | 1.34733200  |
| C | 1.79673100  | 2.64325600  | -0.91669800 | H                                                                    | -5.20430500 | 0.30632100  | 2.26684200  |
| C | 1.92201000  | 2.63481700  | 0.53130900  | H                                                                    | -5.23426400 | 1.80671700  | 1.31676200  |
| C | 1.85686500  | -2.63633500 | -0.91952900 | H                                                                    | -6.68003900 | 0.78492700  | 1.39952800  |
| C | 1.95908600  | -2.64483700 | 0.50862900  | C                                                                    | -5.69100700 | 0.65041400  | -1.18049800 |
| C | 1.93720900  | 3.85880200  | -1.78444600 | H                                                                    | -5.39046400 | 0.10111400  | -2.08123900 |
| H | 2.95476300  | 4.26955500  | -1.74407000 | H                                                                    | -6.78722500 | 0.66876700  | -1.13996300 |
| H | 1.71825700  | 3.58878900  | -2.82003700 | H                                                                    | -5.34080400 | 1.68429200  | -1.27813100 |
| H | 1.24872600  | 4.65597400  | -1.47789600 |                                                                      |             |             |             |
| C | 2.24949800  | 3.88459300  | 1.30336600  |                                                                      |             |             |             |
| H | 1.40357300  | 4.19447000  | 1.93223400  | Co <sup>(4-tBu<sub>3</sub>py)(prdioXH)</sup> (low-spin/closed-shell) |             |             |             |
| H | 3.10548200  | 3.72442700  | 1.97004500  | Co                                                                   | 1.34572110  | 0.00469700  | -0.13237301 |
| H | 2.48984100  | 4.71311700  | 0.63514100  | N                                                                    | 1.72582112  | 1.42167310  | 1.07499608  |
| C | 2.04440200  | -3.79390800 | -1.85683500 | N                                                                    | 1.75662712  | -1.40054510 | 1.07458808  |
| H | 2.33922500  | -4.70288500 | -1.32794900 | N                                                                    | 1.60369812  | -1.35283610 | -1.37288610 |
| H | 1.12014900  | -4.00839700 | -2.41011800 | N                                                                    | 1.55661311  | 1.37307010  | -1.38604210 |
| H | 2.81303800  | -3.56702200 | -2.60658400 | C                                                                    | 1.81675013  | 1.29269309  | 2.53869218  |
| C | 2.29716700  | -3.87125000 | 1.31663600  | C                                                                    | 1.83548613  | -1.26864409 | 2.53928318  |
| H | 3.15170100  | -3.68776600 | 1.98136500  | C                                                                    | 1.15997008  | 0.00733300  | 3.04139822  |
| H | 1.45587900  | -4.17858900 | 1.95474800  | H                                                                    | 2.87688121  | 1.30283410  | 2.84037820  |
| H | 2.55074300  | -4.71949800 | 0.67764400  | H                                                                    | 1.33898410  | 2.15064515  | 3.03126022  |
| O | 1.39674700  | 1.23457100  | -2.73900000 | H                                                                    | 1.20239809  | 0.00743100  | 4.13851030  |
| O | 1.46087000  | -1.24230100 | -2.77915700 | H                                                                    | 0.10138101  | -0.00036200 | 2.75443820  |
| H | 1.39305000  | -0.17731900 | -2.87984900 | H                                                                    | 1.36391510  | -2.13133215 | 3.02951322  |
| C | -1.48187500 | 1.17356100  | -0.10567800 | H                                                                    | 2.89330821  | -1.26638609 | 2.84967220  |
| C | -1.42455600 | -1.13981000 | -0.00857100 | C                                                                    | 1.73258913  | 2.62256819  | -0.92295107 |
| C | -2.87810400 | 1.18160900  | -0.05031000 | C                                                                    | 1.84349613  | 2.63372119  | 0.50980604  |
| H | -0.92265800 | 2.10087700  | -0.17043900 | C                                                                    | 1.80106613  | -2.60421019 | -0.91767006 |
| C | -2.82302000 | -1.21166600 | 0.05044100  | C                                                                    | 1.90662414  | -2.61671619 | 0.51390204  |
| H | -0.81696200 | -2.03802900 | 0.00697300  | C                                                                    | 1.81899413  | 3.82750528  | -1.81421813 |
| C | -3.59654600 | -0.03342600 | 0.03238700  | H                                                                    | 2.82882420  | 4.25977831  | -1.81331313 |
| H | -3.39222700 | 2.13712500  | -0.07264700 | H                                                                    | 1.57304911  | 3.54051525  | -2.83883520 |
| H | -3.28859400 | -2.18828700 | 0.11041900  | H                                                                    | 1.12506808  | 4.61472033  | -1.49583211 |
| N | -0.74980900 | 0.03144300  | -0.08385900 | C                                                                    | 2.10060715  | 3.89801928  | 1.28725609  |
| C | -5.13089300 | -0.03062200 | 0.09657700  | H                                                                    | 1.24573709  | 4.16586330  | 1.92332814  |
| C | -5.71424300 | -1.45593500 | 0.18777500  | H                                                                    | 2.97198622  | 3.79098627  | 1.94538414  |
| H | -6.80822400 | -1.39786000 | 0.23212400  | H                                                                    | 2.28930317  | 4.73803834  | 0.61556904  |
| H | -5.44898300 | -2.06209800 | -0.68730900 | C                                                                    | 1.89797214  | -3.77240927 | -1.85355814 |
| H | -5.37189800 | -1.97879100 | 1.08947100  | H                                                                    | 1.96022514  | -4.72090434 | -1.31561210 |
|   |             |             |             | H                                                                    | 1.02505507  | -3.80911628 | -2.51653618 |



|                                                                           |             |             |             |   |             |             |             |
|---------------------------------------------------------------------------|-------------|-------------|-------------|---|-------------|-------------|-------------|
| H                                                                         | 2.78063420  | -3.68696526 | -2.50119718 | C | -1.82925400 | 1.31131800  | 2.54711400  |
| C                                                                         | 2.19211216  | -3.85940828 | 1.31676009  | C | -1.17394500 | 0.01389500  | 3.02945100  |
| H                                                                         | 3.03552622  | -3.70375026 | 2.00081115  | H | -2.92978500 | -1.24225200 | 2.83807900  |
| H                                                                         | 1.32928109  | -4.15566530 | 1.92914814  | H | -1.41642400 | -2.12861900 | 3.05835400  |
| H                                                                         | 2.44217718  | -4.70243634 | 0.67019305  | H | -1.19910800 | 0.01650700  | 4.12562300  |
| O                                                                         | 1.40283010  | 1.19782309  | -2.75002720 | H | -0.11980800 | -0.00259600 | 2.73066500  |
| O                                                                         | 1.44671710  | -1.20179109 | -2.74460020 | H | -1.35570900 | 2.16245400  | 3.05154800  |
| H                                                                         | 1.40646510  | -0.02594100 | -2.86030920 | H | -2.89309900 | 1.31945400  | 2.82906900  |
| C                                                                         | -1.33630310 | 1.14153208  | -0.02625900 | C | -1.84011700 | -2.60365500 | -0.95074200 |
| C                                                                         | -1.30487810 | -1.18250408 | -0.01202300 | C | -1.98550300 | -2.59841500 | 0.51914300  |
| C                                                                         | -2.73033820 | 1.15713308  | 0.00736200  | C | -1.74646300 | 2.63682500  | -0.96026300 |
| H                                                                         | -0.76664206 | 2.06423315  | -0.04664200 | C | -1.89548000 | 2.64195600  | 0.50915300  |
| C                                                                         | -2.70217219 | -1.23652009 | 0.02283600  | C | -1.99064700 | -3.81679000 | -1.81150000 |
| H                                                                         | -0.71188505 | -2.09087415 | -0.02072700 | H | -3.01509700 | -4.20661200 | -1.76505200 |
| C                                                                         | -3.46410425 | -0.05104200 | 0.03177900  | H | -1.76278400 | -3.56708000 | -2.84896800 |
| H                                                                         | -3.23203823 | 2.11912415  | 0.01217300  | H | -1.31799700 | -4.61888900 | -1.48622300 |
| H                                                                         | -3.17642723 | -2.21036416 | 0.04031400  | C | -2.33962200 | -3.84760800 | 1.27069000  |
| N                                                                         | -0.62010305 | -0.01322100 | -0.03840300 | H | -1.48095100 | -4.20374500 | 1.85544900  |
| C                                                                         | -4.99834636 | -0.03447600 | 0.05786200  | H | -3.15807800 | -3.66266100 | 1.97492200  |
| C                                                                         | -5.59610942 | -1.45594510 | 0.09976401  | H | -2.64061500 | -4.64968100 | 0.59642200  |
| H                                                                         | -6.69018248 | -1.38854910 | 0.11903201  | C | -1.84786500 | 3.85155700  | -1.82567100 |
| H                                                                         | -5.31504036 | -2.04260915 | -0.78349606 | H | -1.13562100 | 4.62276800  | -1.50990300 |
| H                                                                         | -5.28139538 | -2.00397914 | 0.99655007  | H | -1.64013700 | 3.58674300  | -2.86359500 |
| C                                                                         | -5.47950140 | 0.73992305  | 1.31366910  | H | -2.85235700 | 4.28924200  | -1.77286900 |
| H                                                                         | -5.12947437 | 0.25366602  | 2.23259616  | C | -2.20324100 | 3.90615900  | 1.25619400  |
| H                                                                         | -5.12207237 | 1.77598913  | 1.31710010  | H | -3.03902300 | 3.75849200  | 1.94887200  |
| H                                                                         | -6.57607546 | 0.76316506  | 1.33501509  | H | -1.33760800 | 4.22248600  | 1.85345800  |
| C                                                                         | -5.51445440 | 0.68209205  | -1.21867009 | H | -2.45786700 | 4.72151500  | 0.57875600  |
| H                                                                         | -5.18975837 | 0.15315001  | -2.12310415 | O | -1.36077700 | -1.20061500 | -2.74314500 |
| H                                                                         | -6.61110747 | 0.70766605  | -1.21091009 | O | -1.31411700 | 1.21127100  | -2.74664800 |
| H                                                                         | -5.15428737 | 1.71551912  | -1.27928709 | H | -1.29485400 | 0.00450000  | -2.84802700 |
|                                                                           |             |             |             | C | 1.37408600  | -1.18811500 | -0.03720800 |
|                                                                           |             |             |             | C | 1.40861000  | 1.12917200  | -0.01298500 |
|                                                                           |             |             |             | C | 2.77121600  | -1.24798200 | 0.00775600  |
|                                                                           |             |             |             | H | 0.78995100  | -2.10012000 | -0.06617600 |
|                                                                           |             |             |             | C | 2.80252400  | 1.14527200  | 0.03243700  |
|                                                                           |             |             |             | H | 0.84976900  | 2.05698500  | -0.02224300 |
|                                                                           |             |             |             | C | 3.53432300  | -0.06399000 | 0.04263700  |
|                                                                           |             |             |             | H | 3.24358200  | -2.22260300 | 0.01221700  |
| Co <sup>II</sup> ( <sup>4</sup> -tBu <sub>3</sub> py)(prdioXH) (low-spin) |             |             |             |   |             |             |             |
| Co                                                                        | -1.42790400 | 0.01164500  | -0.13577100 |   |             |             |             |
| N                                                                         | -1.77200800 | -1.43299100 | 1.09195300  |   |             |             |             |
| N                                                                         | -1.72603600 | 1.47107800  | 1.08576400  |   |             |             |             |
| N                                                                         | -1.50316400 | 1.42340800  | -1.41365700 |   |             |             |             |
| N                                                                         | -1.55302600 | -1.40164100 | -1.40882600 |   |             |             |             |
| C                                                                         | -1.86699300 | -1.26559100 | 2.55293200  |   |             |             |             |

|                                                                               |             |             |             |    |             |             |             |
|-------------------------------------------------------------------------------|-------------|-------------|-------------|----|-------------|-------------|-------------|
| H                                                                             | 3.30513200  | 2.10613000  | 0.05709900  | C  | 3.95043800  | -0.88888600 | 1.26831000  |
| N                                                                             | 0.68554300  | -0.02088000 | -0.04940500 | H  | 4.18886200  | -0.02241200 | 1.89907300  |
| C                                                                             | 5.06781200  | -0.04927100 | 0.08267700  | H  | 3.88233000  | -1.76254200 | 1.92640900  |
| C                                                                             | 5.59482400  | 0.69802500  | -1.17174100 | H  | 4.78460100  | -1.04309000 | 0.58303600  |
| H                                                                             | 6.69129900  | 0.71852800  | -1.15489000 | C  | -3.89794700 | -0.58812400 | -1.71749600 |
| H                                                                             | 5.27507500  | 0.19371700  | -2.09181300 | H  | -4.61566100 | 0.18038900  | -1.40660600 |
| H                                                                             | 5.23984700  | 1.73432000  | -1.20835900 | H  | -3.63670000 | -0.42060200 | -2.76397500 |
| C                                                                             | 5.53549700  | 0.69587800  | 1.36138500  | H  | -4.40059900 | -1.56028800 | -1.63779000 |
| H                                                                             | 5.17701100  | 0.18820300  | 2.26524400  | C  | -3.92003200 | -0.87531600 | 1.37063300  |
| H                                                                             | 6.63164800  | 0.71831100  | 1.39334900  | H  | -3.83832900 | -1.74552600 | 2.03174200  |
| H                                                                             | 5.17809100  | 1.73168100  | 1.38549600  | H  | -4.13942500 | -0.00444800 | 2.00223500  |
| C                                                                             | 5.66462800  | -1.47151100 | 0.09623300  | H  | -4.77194500 | -1.03032100 | 0.70777600  |
| H                                                                             | 5.34217800  | -2.04071500 | 0.97687600  | O  | 1.17227300  | -0.29736800 | -2.73408100 |
| H                                                                             | 5.39206400  | -2.03685500 | -0.80342100 | O  | -1.24398500 | -0.30009600 | -2.70255900 |
| H                                                                             | 6.75834300  | -1.40485200 | 0.12725000  | H  | -0.03564100 | -0.28226600 | -2.81373700 |
| Co <sup>II</sup> ( <sup>4</sup> -tBu <sub>3</sub> py)(Cl)(prdioXH) (low-spin) |             |             |             | C  | 1.15847300  | 2.54527300  | 0.02407000  |
| Co                                                                            | -0.00244800 | -0.44467900 | -0.11240500 | C  | -1.15291700 | 2.55530400  | -0.01212600 |
| N                                                                             | 1.48297500  | -0.59738100 | 1.10575200  | C  | 1.20479400  | 3.94445900  | 0.07617600  |
| N                                                                             | -1.45669100 | -0.59309500 | 1.14419400  | H  | 2.07765200  | 1.97115700  | 0.01799200  |
| N                                                                             | -1.44225300 | -0.42455500 | -1.35739900 | C  | -1.18765800 | 3.95066900  | 0.03737000  |
| N                                                                             | 1.40483700  | -0.42424900 | -1.39427100 | H  | -2.07481300 | 1.98691500  | -0.04795200 |
| C                                                                             | 1.32190900  | -0.72895900 | 2.56057900  | C  | 0.01279000  | 4.69530500  | 0.08490300  |
| C                                                                             | -1.26047100 | -0.71888900 | 2.59538000  | H  | 2.17395600  | 4.42744700  | 0.10934900  |
| C                                                                             | 0.03975100  | -0.05372300 | 3.06178400  | H  | -2.15466300 | 4.44302600  | 0.03805100  |
| H                                                                             | 1.29505200  | -1.80044300 | 2.81043700  | Cl | 0.00200100  | -3.18437200 | -0.28454300 |
| H                                                                             | 2.18370300  | -0.29628000 | 3.08370400  | N  | 0.00232200  | 1.84152000  | -0.01936700 |
| H                                                                             | 0.05421200  | -0.08858800 | 4.15834100  | C  | -0.01759700 | 6.22896100  | 0.13980300  |
| H                                                                             | 0.03996000  | 1.00302600  | 2.77035800  | C  | -0.73406800 | 6.76591600  | -1.12786700 |
| H                                                                             | -2.10490700 | -0.27496200 | 3.13716100  | C  | -0.80077100 | 6.67562100  | 1.40295900  |
| H                                                                             | -1.23799200 | -1.78916400 | 2.85095500  | C  | 1.39826700  | 6.83878900  | 0.19908400  |
| C                                                                             | 2.63563300  | -0.55136300 | -0.94316600 | H  | -0.77404100 | 7.86165300  | -1.09375300 |
| C                                                                             | 2.65991400  | -0.67511500 | 0.52703700  | H  | -0.19594500 | 6.47076100  | -2.03701500 |
| C                                                                             | -2.66127200 | -0.55159800 | -0.87499000 | H  | -1.76222400 | 6.39418400  | -1.20332000 |
| C                                                                             | -2.64813400 | -0.66966200 | 0.59568700  | H  | -0.31308500 | 6.31221700  | 2.31591300  |
| C                                                                             | 3.85107800  | -0.58367600 | -1.81612200 | H  | -0.83750400 | 7.77102800  | 1.44690400  |
| H                                                                             | 4.35105300  | -1.55890100 | -1.75981100 | H  | -1.83239200 | 6.30553100  | 1.39582000  |
| H                                                                             | 3.56539600  | -0.40309600 | -2.85396800 | H  | 1.94559700  | 6.51154900  | 1.09184500  |
| H                                                                             | 4.57951800  | 0.17803100  | -1.51379400 | H  | 1.99169900  | 6.58052400  | -0.68675600 |
|                                                                               |             |             |             | H  | 1.32034900  | 7.93158200  | 0.23878200  |

Co<sup>II</sup>(Cl)(prdioH) (low-spin)

|    |             |             |             |
|----|-------------|-------------|-------------|
| Co | -0.00005400 | -0.11754400 | -0.10954700 |
| N  | -1.45928400 | 1.12583600  | -0.28141600 |
| N  | 1.45919500  | 1.12591600  | -0.28148800 |
| N  | 1.41741800  | -1.38323800 | -0.22854200 |
| N  | -1.41750900 | -1.38329700 | -0.22834300 |
| C  | -1.29042400 | 2.58903100  | -0.28830500 |
| C  | 1.29031700  | 2.58912100  | -0.28817900 |
| C  | -0.00009800 | 3.01945400  | 0.41680900  |
| H  | -1.27875700 | 2.93597000  | -1.33311600 |
| H  | -2.14332200 | 3.07167600  | 0.20377600  |
| H  | -0.00012600 | 4.11515000  | 0.46931000  |
| H  | -0.00014400 | 2.63549100  | 1.44314200  |
| H  | 2.14314300  | 3.07169500  | 0.20409200  |
| H  | 1.27877300  | 2.93622000  | -1.33293000 |
| C  | -2.63941700 | -0.90891000 | -0.35325000 |
| C  | -2.64318800 | 0.56620000  | -0.39706400 |
| C  | 2.63931000  | -0.90885100 | -0.35343000 |
| C  | 2.64308200  | 0.56627300  | -0.39719100 |
| C  | -3.86712500 | -1.76079700 | -0.42217500 |
| H  | -4.37175900 | -1.65231200 | -1.39036900 |
| H  | -3.59774500 | -2.80983500 | -0.28866900 |
| H  | -4.58534400 | -1.48010500 | 0.35715400  |
| C  | -3.92557200 | 1.33363900  | -0.54789300 |
| H  | -4.19271000 | 1.82652200  | 0.39649000  |
| H  | -3.83221500 | 2.11423400  | -1.31016800 |
| H  | -4.75202700 | 0.67877300  | -0.82635500 |
| C  | 3.86701000  | -1.76075500 | -0.42234700 |
| H  | 4.58560800  | -1.47944000 | 0.35639400  |
| H  | 3.59771100  | -2.80970200 | -0.28793000 |
| H  | 4.37114900  | -1.65301000 | -1.39088500 |
| C  | 3.92554200  | 1.33358800  | -0.54797900 |
| H  | 3.83172800  | 2.11560800  | -1.30870600 |
| H  | 4.19389100  | 1.82454200  | 0.39706900  |
| H  | 4.75144500  | 0.67889500  | -0.82853000 |
| O  | -1.20622900 | -2.72926600 | -0.15968200 |
| O  | 1.20619000  | -2.72924700 | -0.16001700 |
| H  | 0.00013800  | -2.83140700 | -0.13550900 |
| Cl | 0.00041200  | -0.16421400 | 2.40386300  |

Co<sup>II</sup>(Cl<sub>2</sub>)(prdioH) (low-spin)

|    |             |             |             |
|----|-------------|-------------|-------------|
| Co | 0.11441800  | -0.00968300 | -0.00444800 |
| N  | -1.35113400 | 1.11690200  | -0.54104900 |
| N  | 1.57651100  | 1.21553400  | -0.27831900 |
| N  | 1.53474000  | -1.15900700 | 0.52239400  |
| N  | -1.30018600 | -1.24952200 | 0.27976300  |
| C  | -1.17146200 | 2.49467100  | -1.01737900 |
| C  | 1.39797100  | 2.58831000  | -0.77079100 |
| C  | 0.03934600  | 3.16958800  | -0.36100100 |
| H  | -1.03561000 | 2.46898000  | -2.10935200 |
| H  | -2.06720000 | 3.09434000  | -0.81522600 |
| H  | 0.02881200  | 4.22861800  | -0.64861700 |
| H  | -0.06383800 | 3.11198100  | 0.72868500  |
| H  | 2.19413700  | 3.24092800  | -0.39189200 |
| H  | 1.48113100  | 2.57799500  | -1.86854100 |
| C  | -2.52267500 | -0.84297300 | 0.01076800  |
| C  | -2.53189300 | 0.54632300  | -0.48191800 |
| C  | 2.75746500  | -0.67671800 | 0.45997200  |
| C  | 2.76334600  | 0.71642300  | -0.02209100 |
| C  | -3.74580200 | -1.68857900 | 0.18770800  |
| H  | -4.24221600 | -1.87698200 | -0.77270100 |
| H  | -3.46890100 | -2.64895800 | 0.62653800  |
| H  | -4.47458000 | -1.19955500 | 0.84526600  |
| C  | -3.81838700 | 1.21915100  | -0.87874500 |
| H  | -4.06461300 | 2.03254800  | -0.18357600 |
| H  | -3.74323500 | 1.65512200  | -1.88114600 |
| H  | -4.65231100 | 0.51605700  | -0.87612400 |
| C  | 3.98464500  | -1.44875800 | 0.83510500  |
| H  | 4.55529100  | -0.93210100 | 1.61634700  |
| H  | 3.70068800  | -2.43562300 | 1.20534500  |
| H  | 4.65044400  | -1.58009100 | -0.02720200 |
| C  | 4.05318000  | 1.47160200  | -0.19687400 |
| H  | 4.12074700  | 1.90801000  | -1.19973300 |
| H  | 4.12537200  | 2.29545200  | 0.52527800  |
| H  | 4.91775500  | 0.82317600  | -0.04952000 |
| O  | -1.08352100 | -2.51553600 | 0.74764500  |
| O  | 1.32242600  | -2.44028000 | 0.94955700  |
| H  | 0.12140500  | -2.56650800 | 0.88317400  |
| Cl | -0.13250500 | 0.81677400  | 2.57691800  |

|                                                                |             |             |             |                                                                  |             |             |             |
|----------------------------------------------------------------|-------------|-------------|-------------|------------------------------------------------------------------|-------------|-------------|-------------|
| Cl                                                             | 0.36079400  | -0.88427400 | -2.56370500 | H                                                                | -0.31724700 | 0.35518400  | 2.89590100  |
|                                                                |             |             |             | C                                                                | -1.11639400 | 2.09341100  | -0.68860200 |
| Co <sup>II</sup> (H)( <sup>4-tBu</sup> py)(prdioXH) (low-spin) |             |             |             | C                                                                | 1.19529800  | 2.15361200  | -0.53989700 |
| Co                                                             | -0.01190400 | -0.54354800 | 0.31092200  | C                                                                | -1.15714400 | 3.41142500  | -1.14691500 |
| N                                                              | -1.41738800 | -1.04030000 | -0.88652800 | H                                                                | -2.02327300 | 1.51594600  | -0.55872000 |
| N                                                              | 1.47758800  | -1.08738400 | -0.76296000 | C                                                                | 1.23092400  | 3.47754400  | -0.99528000 |
| N                                                              | 1.35587700  | -0.21112200 | 1.58696400  | H                                                                | 2.11308800  | 1.63332400  | -0.29186900 |
| N                                                              | -1.47447100 | -0.18371800 | 1.43832300  | C                                                                | 0.03570700  | 4.15108400  | -1.31578200 |
| C                                                              | -1.19556600 | -1.62855300 | -2.20759100 | H                                                                | -2.12471800 | 3.84946800  | -1.36916100 |
| C                                                              | 1.36763600  | -1.62426200 | -2.12736600 | H                                                                | 2.19450500  | 3.96299700  | -1.09185100 |
| C                                                              | 0.10765700  | -1.13680000 | -2.84466500 | N                                                                | 0.04483900  | 1.45861500  | -0.38429600 |
| H                                                              | -1.16297600 | -2.73294900 | -2.14533000 | H                                                                | -0.05096800 | -1.92297300 | 0.79398100  |
| H                                                              | -2.02698500 | -1.37934600 | -2.88215600 | C                                                                | -0.00674700 | 5.59915300  | -1.82352300 |
| H                                                              | 0.14899100  | -1.50702100 | -3.87763100 | C                                                                | 1.39987600  | 6.22445200  | -1.92303300 |
| H                                                              | 0.10573200  | -0.04079000 | -2.88698100 | H                                                                | 2.04121000  | 5.67653200  | -2.62457800 |
| H                                                              | 2.25159300  | -1.34125200 | -2.71378900 | H                                                                | 1.31383900  | 7.25477100  | -2.28799500 |
| H                                                              | 1.35343900  | -2.72575200 | -2.07920300 | H                                                                | 1.90037400  | 6.25755700  | -0.94740900 |
| C                                                              | -2.70603900 | -0.55297000 | 1.00939300  | C                                                                | -0.85968800 | 6.45454100  | -0.84921700 |
| C                                                              | -2.66209900 | -1.05311900 | -0.32260100 | H                                                                | -0.90449500 | 7.48990200  | -1.20905900 |
| C                                                              | 2.59282500  | -0.55045700 | 1.22841500  | H                                                                | -1.88731200 | 6.08143000  | -0.77166800 |
| C                                                              | 2.63962800  | -1.07301200 | -0.13009400 | H                                                                | -0.42055000 | 6.45965400  | 0.15596100  |
| C                                                              | -3.90764000 | -0.41109700 | 1.89868200  | C                                                                | -0.65837400 | 5.62049800  | -3.23208000 |
| H                                                              | -3.78292200 | -0.99065000 | 2.82256700  | H                                                                | -0.70112200 | 6.65155700  | -3.60449300 |
| H                                                              | -4.05382500 | 0.63427700  | 2.20116800  | H                                                                | -0.07457900 | 5.02298700  | -3.94317600 |
| H                                                              | -4.82072900 | -0.75030400 | 1.40439700  | H                                                                | -1.68101900 | 5.22691200  | -3.21301700 |
| C                                                              | -3.86980500 | -1.55479000 | -1.07270200 |                                                                  |             |             |             |
| H                                                              | -4.09158000 | -0.93248800 | -1.95189100 | Co <sup>III</sup> (Cl)( <sup>4-tBu</sup> py)(prdioXH) (low-spin) |             |             |             |
| H                                                              | -3.71878000 | -2.58017600 | -1.43578300 | Co                                                               | -1.24783000 | 0.01105900  | -0.13994700 |
| H                                                              | -4.76048400 | -1.55696900 | -0.44097400 | N                                                                | -1.47592600 | -1.36886400 | 1.18635500  |
| C                                                              | 3.77948700  | -0.40652600 | 2.13289200  | N                                                                | -1.39971200 | 1.55028600  | 1.00587700  |
| H                                                              | 4.56069100  | 0.21516500  | 1.67853900  | N                                                                | -1.09057000 | 1.35637500  | -1.48227200 |
| H                                                              | 3.46527700  | 0.05887200  | 3.06962800  | N                                                                | -1.26447300 | -1.48633500 | -1.31711200 |
| H                                                              | 4.22747300  | -1.38130900 | 2.36538000  | C                                                                | -1.81411200 | -1.11300900 | 2.59782800  |
| C                                                              | 3.92456500  | -1.56640700 | -0.73808300 | C                                                                | -1.80136500 | 1.46388100  | 2.42294600  |
| H                                                              | 3.81071600  | -2.58647100 | -1.12368700 | C                                                                | -1.28112600 | 0.21302400  | 3.13743000  |
| H                                                              | 4.23320500  | -0.93342600 | -1.58058400 | H                                                                | -2.91085300 | -1.12626500 | 2.67735900  |
| H                                                              | 4.73447000  | -1.56758200 | -0.00732900 | H                                                                | -1.43183800 | -1.92645300 | 3.22409600  |
| O                                                              | -1.36691000 | 0.27241400  | 2.76868100  | H                                                                | -1.61049200 | 0.28558000  | 4.18055500  |
| O                                                              | 1.11666500  | 0.30312200  | 2.81303700  | H                                                                | -0.18772100 | 0.19745500  | 3.16608200  |

|    |             |             |             |                                                                  |             |             |             |
|----|-------------|-------------|-------------|------------------------------------------------------------------|-------------|-------------|-------------|
| H  | -1.45589000 | 2.35178600  | 2.96333800  | H                                                                | 6.85494900  | -0.87456900 | -0.88514200 |
| H  | -2.90015700 | 1.47039500  | 2.44980000  | H                                                                | 5.45053300  | -1.94538800 | -0.99387300 |
| C  | -1.36587400 | -2.67457900 | -0.76853600 | C                                                                | 5.53557500  | -0.74518200 | 1.50153900  |
| C  | -1.51678900 | -2.58490000 | 0.69569800  | H                                                                | 6.62917600  | -0.75363700 | 1.58124700  |
| C  | -1.09836400 | 2.60372600  | -1.07830900 | H                                                                | 5.14141900  | -0.19132100 | 2.36104900  |
| C  | -1.33515300 | 2.70016400  | 0.37628500  | H                                                                | 5.17919100  | -1.78033900 | 1.56677200  |
| C  | -1.38124600 | -3.94932400 | -1.54618200 | C                                                                | 5.64164700  | 1.36451400  | 0.10023700  |
| H  | -2.35854200 | -4.44183200 | -1.47126400 | H                                                                | 5.24809700  | 1.97042400  | 0.92430900  |
| H  | -1.17634200 | -3.74739800 | -2.59835900 | H                                                                | 6.73547700  | 1.36482900  | 0.17625800  |
| H  | -0.62774200 | -4.64768900 | -1.16531500 | H                                                                | 5.36394800  | 1.84700800  | -0.84462900 |
| C  | -1.77270400 | -3.81183900 | 1.51986800  |                                                                  |             |             |             |
| H  | -1.00346000 | -3.93067000 | 2.29233900  | Co <sup>III</sup> (Cl)( <sup>4</sup> -Pyrpy)(prdioXH) (low-spin) |             |             |             |
| H  | -2.74037200 | -3.74045000 | 2.03026400  | Co                                                               | -1.44734400 | 0.00093600  | -0.10763400 |
| H  | -1.77801700 | -4.71195100 | 0.90610300  | N                                                                | -1.58609200 | -1.47167200 | 1.12134800  |
| C  | -0.93729500 | 3.77626200  | -1.98969400 | N                                                                | -1.59217900 | 1.45788900  | 1.13872900  |
| H  | -0.16123600 | 4.45437800  | -1.61811800 | N                                                                | -1.46697400 | 1.43268300  | -1.36865700 |
| H  | -0.66238000 | 3.43875700  | -2.98984200 | N                                                                | -1.47427200 | -1.41488900 | -1.38641900 |
| H  | -1.87115600 | 4.34726000  | -2.06254900 | C                                                                | -1.67899500 | -1.30073700 | 2.57964200  |
| C  | -1.54622300 | 4.03032400  | 1.03549300  | C                                                                | -1.69257900 | 1.26637300  | 2.59398100  |
| H  | -2.53909700 | 4.07849100  | 1.49753700  | C                                                                | -1.00277600 | -0.01645500 | 3.06144000  |
| H  | -0.80679100 | 4.19603800  | 1.82821000  | H                                                                | -2.74342700 | -1.28836400 | 2.85622300  |
| H  | -1.46408200 | 4.84845500  | 0.32087100  | H                                                                | -1.22048300 | -2.16095500 | 3.08047900  |
| O  | -1.15873100 | -1.34320600 | -2.66063200 | H                                                                | -1.02772900 | -0.02284300 | 4.15718200  |
| O  | -0.94069100 | 1.05178200  | -2.79545800 | H                                                                | 0.05142800  | -0.00972300 | 2.76458800  |
| H  | -1.05568900 | -0.11709100 | -2.84457200 | H                                                                | -1.24828300 | 2.12516600  | 3.10974200  |
| C  | 1.47373300  | -0.67073200 | -0.99825200 | H                                                                | -2.75852900 | 1.23641400  | 2.86309700  |
| C  | 1.42386800  | 0.60385300  | 0.94247100  | C                                                                | -1.65830600 | -2.63086400 | -0.92362400 |
| C  | 2.86906500  | -0.71246700 | -0.96940600 | C                                                                | -1.74634900 | -2.64132800 | 0.54975000  |
| H  | 0.94709600  | -1.14624300 | -1.81254000 | C                                                                | -1.64889200 | 2.64321000  | -0.89134000 |
| C  | 2.81285900  | 0.59360600  | 1.02528100  | C                                                                | -1.75066600 | 2.63454000  | 0.58108700  |
| H  | 0.84851900  | 1.14562200  | 1.67459600  | C                                                                | -1.76909800 | -3.84428500 | -1.78748600 |
| C  | 3.59172700  | -0.08181100 | 0.06049400  | H                                                                | -2.76736900 | -4.29113800 | -1.70271300 |
| H  | 3.37161400  | -1.24320200 | -1.76813400 | H                                                                | -1.59740200 | -3.57758400 | -2.83120800 |
| H  | 3.27162200  | 1.12413400  | 1.85196500  | H                                                                | -1.03907900 | -4.60669100 | -1.49285100 |
| Cl | -3.54048400 | 0.08756900  | -0.35000400 | C                                                                | -2.00862000 | -3.90963900 | 1.30479800  |
| N  | 0.73740600  | -0.03327300 | -0.04757100 | H                                                                | -1.13250700 | -4.19512500 | 1.90128500  |
| C  | 5.12027200  | -0.09718000 | 0.15338400  | H                                                                | -2.84818200 | -3.78288900 | 1.99697900  |
| C  | 5.76513900  | -0.89448400 | -0.99855700 | H                                                                | -2.24042700 | -4.73528600 | 0.63240300  |
| H  | 5.52634900  | -0.46236900 | -1.97808800 | C                                                                | -1.74559200 | 3.86894400  | -1.73935000 |

|                                                                 |             |             |             |   |             |             |             |
|-----------------------------------------------------------------|-------------|-------------|-------------|---|-------------|-------------|-------------|
| H                                                               | -1.02923500 | 4.63132300  | -1.41342300 | N | -1.76964100 | 1.36251700  | -1.53347300 |
| H                                                               | -1.54478900 | 3.61941400  | -2.78209400 | N | -2.37998100 | -1.38573600 | -1.09741800 |
| H                                                               | -2.74894000 | 4.30778300  | -1.67469400 | C | -1.97933800 | -0.71177300 | 2.79909600  |
| C                                                               | -2.02270500 | 3.89310300  | 1.34885600  | C | -1.43569100 | 1.76828600  | 2.40829800  |
| H                                                               | -2.85672300 | 3.75156400  | 2.04459600  | C | -0.98059500 | 0.43004400  | 2.99294800  |
| H                                                               | -1.14610000 | 4.18403500  | 1.94215700  | H | -2.96384500 | -0.41667400 | 3.18985500  |
| H                                                               | -2.26763000 | 4.72130200  | 0.68416000  | H | -1.64680500 | -1.58399400 | 3.37312100  |
| O                                                               | -1.35557700 | -1.18486300 | -2.71387000 | H | -0.85150100 | 0.57209400  | 4.07188100  |
| O                                                               | -1.34118200 | 1.21934900  | -2.69849700 | H | -0.00059900 | 0.15146600  | 2.59113400  |
| H                                                               | -1.31866800 | 0.01864200  | -2.81512800 | H | -0.73959500 | 2.55437300  | 2.72156600  |
| C                                                               | 1.24526800  | -1.16049500 | -0.07916600 | H | -2.42762600 | 2.02851100  | 2.80496500  |
| C                                                               | 1.24471800  | 1.16111500  | 0.00476300  | C | -2.76453400 | -2.44964100 | -0.42845600 |
| C                                                               | 2.62749700  | -1.20728500 | -0.05992200 | C | -2.64140700 | -2.24614400 | 1.02878400  |
| H                                                               | 0.69282300  | -2.08669500 | -0.12256400 | C | -1.63286000 | 2.63517800  | -1.23557800 |
| C                                                               | 2.62690400  | 1.20677200  | 0.03016100  | C | -1.51854100 | 2.84135400  | 0.22207100  |
| H                                                               | 0.69197000  | 2.08755900  | 0.03454800  | C | -3.26765100 | -3.70059600 | -1.06966900 |
| C                                                               | 3.39061400  | -0.00040900 | -0.00628500 | H | -4.32263900 | -3.86661600 | -0.81862500 |
| H                                                               | 3.10889400  | -2.17646700 | -0.09696300 | H | -3.17819000 | -3.62819100 | -2.15436100 |
| H                                                               | 3.10754000  | 2.17550200  | 0.08478400  | H | -2.70371200 | -4.57473800 | -0.72555300 |
| N                                                               | 0.52396100  | 0.00064000  | -0.05154000 | C | -3.07337200 | -3.30098700 | 2.00155900  |
| N                                                               | 4.74327100  | -0.00076200 | 0.00892200  | H | -2.20775300 | -3.71765500 | 2.53269600  |
| C                                                               | 5.57018700  | -1.23006100 | 0.03019800  | H | -3.74776900 | -2.87994000 | 2.75522300  |
| C                                                               | 5.57171100  | 1.22766700  | -0.00117400 | H | -3.58644600 | -4.12153300 | 1.50056800  |
| C                                                               | 6.98659400  | -0.71034500 | 0.32871400  | C | -1.60011300 | 3.72969400  | -2.25076400 |
| H                                                               | 5.21309800  | -1.92575100 | 0.79766300  | H | -0.74122000 | 4.39010400  | -2.09062500 |
| C                                                               | 6.99152100  | 0.70625600  | -0.28054400 | H | -1.54045000 | 3.30795700  | -3.25513500 |
| H                                                               | 5.22580700  | 1.92347300  | -0.77359700 | H | -2.50748200 | 4.34364700  | -2.18824200 |
| H                                                               | 7.14642100  | -0.65839600 | 1.41185000  | C | -1.41166500 | 4.21910200  | 0.80151000  |
| H                                                               | 7.75609000  | 1.35377200  | 0.15683200  | H | -2.06509700 | 4.33188000  | 1.67186900  |
| H                                                               | 5.51106600  | 1.73458400  | 0.97181700  | H | -0.38364900 | 4.42038800  | 1.13095700  |
| H                                                               | 5.52200500  | -1.73668500 | -0.94364200 | H | -1.68119300 | 4.97940400  | 0.06810100  |
| H                                                               | 7.75608200  | -1.35873400 | -0.09862200 | O | -2.40319700 | -1.36459300 | -2.44890500 |
| H                                                               | 7.16548100  | 0.65395500  | -1.36146000 | O | -1.88317200 | 0.95406500  | -2.81678500 |
| Cl                                                              | -3.76338000 | 0.00141200  | -0.19294500 | H | -2.12871300 | -0.22830100 | -2.74509200 |
| Co <sup>III</sup> (Cl)( <sup>4</sup> -Bzpy)(prdioXH) (low-spin) |             |             |             | C | 0.48478300  | -1.59862500 | -0.13451400 |
| Co                                                              | -1.86761300 | 0.14036400  | -0.07099200 | C | 0.98923900  | 0.65293200  | -0.46713400 |
| N                                                               | -2.13875100 | -1.08737700 | 1.38469200  | C | 1.82673900  | -1.95425400 | -0.25442600 |
| N                                                               | -1.51782300 | 1.74179900  | 0.93810700  | H | -0.25883700 | -2.35796400 | 0.04488400  |
|                                                                 |             |             |             | C | 2.35183100  | 0.36974000  | -0.58288700 |

|                                                          |             |             |             |                                                                            |             |             |             |
|----------------------------------------------------------|-------------|-------------|-------------|----------------------------------------------------------------------------|-------------|-------------|-------------|
| H                                                        | 0.64472700  | 1.67033100  | -0.56098100 | C                                                                          | -3.73913500 | -1.68946500 | 0.18934600  |
| C                                                        | 2.79369900  | -0.95875700 | -0.47171300 | H                                                                          | -4.22636300 | -1.87851200 | -0.77509100 |
| H                                                        | 2.11233800  | -2.99676600 | -0.17771600 | H                                                                          | -3.46904500 | -2.64860400 | 0.63355300  |
| H                                                        | 3.03895100  | 1.18449500  | -0.77772200 | H                                                                          | -4.46985100 | -1.19339600 | 0.83823000  |
| N                                                        | 0.05903100  | -0.31028300 | -0.23751000 | C                                                                          | -3.80726700 | 1.22162700  | -0.86371300 |
| Cl                                                       | -4.10861300 | 0.65862700  | 0.09660100  | H                                                                          | -4.05516400 | 2.02901900  | -0.16282300 |
| C                                                        | 4.23264400  | -1.35959800 | -0.66605700 | H                                                                          | -3.72480300 | 1.66416800  | -1.86202900 |
| O                                                        | 4.46984400  | -2.42792700 | -1.28592000 | H                                                                          | -4.64018200 | 0.51844100  | -0.87051700 |
| C                                                        | 5.32723300  | -0.50411000 | -0.14352200 | C                                                                          | 3.97827500  | -1.44945300 | 0.83977300  |
| C                                                        | 6.60541100  | -0.61054700 | -0.73847900 | H                                                                          | 4.54254500  | -0.93160300 | 1.62400700  |
| C                                                        | 5.14173100  | 0.36231700  | 0.95746500  | H                                                                          | 3.69991900  | -2.43937600 | 1.20412200  |
| C                                                        | 7.67510800  | 0.14989100  | -0.25307000 | H                                                                          | 4.64448200  | -1.57067200 | -0.02297400 |
| H                                                        | 6.74154500  | -1.28358600 | -1.57962500 | C                                                                          | 4.03897100  | 1.47197600  | -0.18703900 |
| C                                                        | 6.21980000  | 1.11168500  | 1.45130800  | H                                                                          | 4.10727400  | 1.89640400  | -1.19441500 |
| H                                                        | 4.17588900  | 0.43099800  | 1.44924800  | H                                                                          | 4.10246200  | 2.30329800  | 0.52651600  |
| C                                                        | 7.48423200  | 1.01249800  | 0.84417000  | H                                                                          | 4.90448200  | 0.82873600  | -0.02845800 |
| H                                                        | 8.65179700  | 0.07397200  | -0.72129700 | O                                                                          | -1.07500800 | -2.51827700 | 0.72262400  |
| H                                                        | 6.07630000  | 1.76579900  | 2.30585700  | O                                                                          | 1.31875100  | -2.44369400 | 0.92626200  |
| H                                                        | 8.31578800  | 1.59911700  | 1.22407900  | H                                                                          | 0.12388200  | -2.58183400 | 0.86115800  |
| Co <sup>III</sup> (Cl <sub>2</sub> )(prdioXH) (low-spin) |             |             |             | Cl                                                                         | -0.09795200 | 0.65885400  | 2.19778500  |
| Co                                                       | 0.11389000  | -0.01008400 | 0.00335000  | Cl                                                                         | 0.32580000  | -0.70651100 | -2.18004200 |
| N                                                        | -1.34860600 | 1.12085100  | -0.51737700 | Co <sup>III</sup> ( <sup>4</sup> -tBuPy) <sub>2</sub> (prdioXH) (low-spin) |             |             |             |
| N                                                        | 1.56934800  | 1.21551200  | -0.26140900 | Co                                                                         | -0.05183900 | -0.01241500 | -0.06974900 |
| N                                                        | 1.53670800  | -1.17047900 | 0.51708300  | N                                                                          | -0.04564700 | 1.45350100  | 1.18517900  |
| N                                                        | -1.29958700 | -1.26005500 | 0.27379700  | N                                                                          | -0.04125800 | -1.46603000 | 1.18622200  |
| C                                                        | -1.16680900 | 2.49306800  | -1.01263100 | N                                                                          | 0.02722200  | -1.43660600 | -1.32926300 |
| C                                                        | 1.39152200  | 2.58044600  | -0.77801400 | N                                                                          | 0.03971200  | 1.41781500  | -1.32865600 |
| C                                                        | 0.04309100  | 3.18540600  | -0.38112600 | C                                                                          | -0.25908700 | 1.29457600  | 2.63963000  |
| H                                                        | -1.04085700 | 2.44483600  | -2.10423300 | C                                                                          | -0.22843800 | -1.29750300 | 2.64144700  |
| H                                                        | -2.06489000 | 3.08650000  | -0.81062600 | C                                                                          | -0.98245800 | -0.00985600 | 2.98641200  |
| H                                                        | 0.03869700  | 4.22891100  | -0.71775300 | H                                                                          | 0.70760200  | 1.34712300  | 3.15972100  |
| H                                                        | -0.05741300 | 3.18887700  | 0.70910500  | H                                                                          | -0.86022400 | 2.13446300  | 3.00486700  |
| H                                                        | 2.19595100  | 3.22696700  | -0.41073800 | H                                                                          | -1.14078900 | -0.00966900 | 4.07067400  |
| H                                                        | 1.47447100  | 2.54213900  | -1.87417400 | H                                                                          | -1.97340100 | -0.02267900 | 2.52359700  |
| C                                                        | -2.51760300 | -0.84512500 | 0.01616700  | H                                                                          | -0.79712200 | -2.14959800 | 3.02931500  |
| C                                                        | -2.52555500 | 0.54822700  | -0.46415000 | H                                                                          | 0.75037300  | -1.31610000 | 3.14119800  |
| C                                                        | 2.75237700  | -0.67974600 | 0.46545500  | C                                                                          | 0.23806800  | 2.62047800  | -0.84442900 |
| C                                                        | 2.75374700  | 0.71595900  | -0.00848800 | C                                                                          | 0.19771200  | 2.62121700  | 0.63854000  |

|   |             |             |             |                                            |             |             |             |
|---|-------------|-------------|-------------|--------------------------------------------|-------------|-------------|-------------|
| C | 0.21999400  | -2.64226500 | -0.83855700 | H                                          | 4.51156400  | 0.06678300  | 2.10258500  |
| C | 0.18760800  | -2.63834000 | 0.63969600  | N                                          | 1.93039900  | -0.01744000 | -0.06061200 |
| C | 0.41856200  | 3.84369100  | -1.67841900 | C                                          | -6.41388600 | 0.02373500  | -0.50594000 |
| H | 1.43986200  | 4.23077000  | -1.57438200 | C                                          | -7.02497900 | -1.39019600 | -0.58408500 |
| H | 0.24193600  | 3.61488100  | -2.72998400 | C                                          | -6.80364000 | 0.80616100  | -1.78916800 |
| H | -0.26795800 | 4.63761700  | -1.36583600 | C                                          | -6.99259700 | 0.74977100  | 0.73868400  |
| C | 0.36008800  | 3.89862600  | 1.40020500  | H                                          | -6.80659800 | -1.98149900 | 0.31373000  |
| H | -0.61702600 | 4.37755000  | 1.55248200  | H                                          | -8.11445100 | -1.30747200 | -0.66749300 |
| H | 0.80761600  | 3.73020500  | 2.38198400  | H                                          | -6.66602600 | -1.94142200 | -1.46192000 |
| H | 0.98632300  | 4.60323800  | 0.84936300  | H                                          | -7.89596600 | 0.84126000  | -1.87600600 |
| C | 0.38685200  | -3.86597100 | -1.67605600 | H                                          | -6.43620700 | 1.83834900  | -1.76868000 |
| H | -0.33214200 | -4.64150200 | -1.39020400 | H                                          | -6.40382900 | 0.31665500  | -2.68531500 |
| H | 0.24288400  | -3.62167100 | -2.72938600 | H                                          | -6.61809400 | 1.77590000  | 0.82511900  |
| H | 1.39279400  | -4.28525600 | -1.55077600 | H                                          | -8.08504100 | 0.79660100  | 0.65773000  |
| C | 0.34395400  | -3.91006500 | 1.41338800  | H                                          | -6.74004900 | 0.21241600  | 1.66072900  |
| H | 0.89702200  | -3.74821100 | 2.34210100  | C                                          | 6.30956500  | -0.03241000 | -0.03028800 |
| H | -0.64095800 | -4.31918700 | 1.67755300  | C                                          | 6.92206400  | -0.08662600 | -1.44477300 |
| H | 0.86662100  | -4.66566100 | 0.82517000  | C                                          | 6.78679200  | -1.27595100 | 0.76784600  |
| O | -0.03857500 | 1.20563500  | -2.66827800 | C                                          | 6.80371200  | 1.25840000  | 0.67678600  |
| O | -0.05721600 | -1.21057600 | -2.65531500 | H                                          | 6.63593900  | 0.78378900  | -2.04800300 |
| H | -0.11178600 | 0.05550900  | -2.77883300 | H                                          | 8.01479200  | -0.08802100 | -1.36371000 |
| C | -2.75034900 | 1.15155300  | -0.22833600 | H                                          | 6.62883400  | -0.99651400 | -1.98272000 |
| C | -2.74927500 | -1.16981400 | -0.23968300 | H                                          | 7.88235600  | -1.28476000 | 0.80842000  |
| C | -4.13724900 | 1.18371100  | -0.32835900 | H                                          | 6.41333800  | -1.27019000 | 1.79811500  |
| H | -2.19885600 | 2.07737200  | -0.18438200 | H                                          | 6.45442600  | -2.20370100 | 0.28674000  |
| C | -4.13994300 | -1.20290700 | -0.34184800 | H                                          | 6.43292700  | 1.33084600  | 1.70527800  |
| H | -2.19880000 | -2.09685100 | -0.20449700 | H                                          | 7.89940700  | 1.25605100  | 0.71526900  |
| C | -4.88749200 | -0.01115600 | -0.39138200 | H                                          | 6.48222900  | 2.15369300  | 0.13108900  |
| H | -4.61821800 | 2.15471100  | -0.35773200 |                                            |             |             |             |
| H | -4.61989100 | -2.17217500 | -0.38374200 |                                            |             |             |             |
| N | -2.04106400 | -0.01124500 | -0.18235800 | Co <sup>III</sup> (Cl)(prdioxH) (low-spin) |             |             |             |
| C | 2.63461300  | -0.06848400 | -1.22289300 | Co                                         | 0.00042900  | -0.11458400 | -0.11743000 |
| C | 2.63767600  | 0.02932900  | 1.10093000  | N                                          | -1.45436000 | 1.12693700  | -0.25856100 |
| C | 4.02902200  | -0.07336000 | -1.25430800 | N                                          | 1.45584000  | 1.12700600  | -0.25303200 |
| H | 2.07711600  | -0.10971500 | -2.14833500 | N                                          | 1.42311700  | -1.39498200 | -0.19655800 |
| C | 4.02823400  | 0.02719000  | 1.13306200  | N                                          | -1.42272000 | -1.39459500 | -0.20167700 |
| H | 2.07950700  | 0.06964200  | 2.02249800  | C                                          | -1.28270300 | 2.59254700  | -0.26011300 |
| C | 4.77835100  | -0.02547500 | -0.06299400 | C                                          | 1.28733400  | 2.59316700  | -0.24727300 |
| H | 4.51144600  | -0.11655900 | -2.22228500 | C                                          | -0.00120200 | 3.02504800  | 0.45370200  |
|   |             |             |             | H                                          | -1.27127800 | 2.93812900  | -1.30366300 |



|                                                                               |              |              |              |   |              |              |              |
|-------------------------------------------------------------------------------|--------------|--------------|--------------|---|--------------|--------------|--------------|
| H                                                                             | -2.14006100  | 3.06024600   | 0.23473200   | H | -1.161246000 | -2.735308000 | -2.161641000 |
| H                                                                             | -0.00139400  | 4.11989100   | 0.49403700   | H | -2.036929000 | -1.369221000 | -2.865444000 |
| H                                                                             | -0.00657400  | 2.65950600   | 1.48571400   | H | 0.141705000  | -1.463459000 | -3.875333000 |
| H                                                                             | 2.14030300   | 3.05510900   | 0.26056200   | H | 0.083348000  | -0.015973000 | -2.870975000 |
| H                                                                             | 1.28910100   | 2.94600800   | -1.28839800  | H | 2.246185000  | -1.278154000 | -2.719774000 |
| C                                                                             | -2.63945900  | -0.91236400  | -0.31935800  | H | 1.384604000  | -2.692586000 | -2.100980000 |
| C                                                                             | -2.63678200  | 0.56487300   | -0.37121900  | C | -2.667031000 | -0.548964000 | 1.042504000  |
| C                                                                             | 2.63971100   | -0.91309600  | -0.31838100  | C | -2.615994000 | -1.096413000 | -0.321240000 |
| C                                                                             | 2.63758100   | 0.56400500   | -0.36911700  | C | 2.582389000  | -0.527769000 | 1.236690000  |
| C                                                                             | -3.86773500  | -1.75669600  | -0.37204000  | C | 2.638675000  | -1.057645000 | -0.133655000 |
| H                                                                             | -4.35390700  | -1.67707200  | -1.35204800  | C | -3.914304000 | -0.395038000 | 1.851956000  |
| H                                                                             | -3.61367900  | -2.80244500  | -0.19582200  | H | -4.328592000 | -1.374400000 | 2.122750000  |
| H                                                                             | -4.59237300  | -1.43420200  | 0.38379700   | H | -3.696998000 | 0.151665000  | 2.770823000  |
| C                                                                             | -3.91441400  | 1.32967800   | -0.52185100  | H | -4.684613000 | 0.146186000  | 1.291575000  |
| H                                                                             | -4.20887300  | 1.76368900   | 0.44359400   | C | -3.851662000 | -1.603300000 | -1.005447000 |
| H                                                                             | -3.80545200  | 2.15222100   | -1.23437800  | H | -4.156156000 | -0.925119000 | -1.813466000 |
| H                                                                             | -4.72714800  | 0.68545800   | -0.85741600  | H | -3.679091000 | -2.588280000 | -1.451582000 |
| C                                                                             | 3.86739500   | -1.75795600  | -0.37695900  | H | -4.685696000 | -1.685527000 | -0.307887000 |
| H                                                                             | 4.59744400   | -1.43403300  | 0.37295700   | C | 3.763996000  | -0.377594000 | 2.139896000  |
| H                                                                             | 3.61407800   | -2.80323000  | -0.19682800  | H | 4.546335000  | 0.229347000  | 1.670033000  |
| H                                                                             | 4.34673800   | -1.68080000  | -1.36059400  | H | 3.461931000  | 0.100842000  | 3.072703000  |
| C                                                                             | 3.91522900   | 1.32820600   | -0.52166200  | H | 4.201823000  | -1.355174000 | 2.376781000  |
| H                                                                             | 3.80284300   | 2.15690000   | -1.22640700  | C | 3.926916000  | -1.535710000 | -0.736381000 |
| H                                                                             | 4.21682400   | 1.75349900   | 0.44548500   | H | 3.811747000  | -2.539205000 | -1.160486000 |
| H                                                                             | 4.72465900   | 0.68547600   | -0.86806500  | H | 4.247428000  | -0.871912000 | -1.549854000 |
| O                                                                             | -1.20146400  | -2.72346600  | -0.12145100  | H | 4.726316000  | -1.566575000 | 0.004167000  |
| O                                                                             | 1.20108300   | -2.72343800  | -0.11671000  | O | -1.307092000 | 0.322244000  | 2.708687000  |
| H                                                                             | -0.00163000  | -2.84184000  | -0.09357400  | O | 1.094703000  | 0.323814000  | 2.801111000  |
| Cl                                                                            | -0.00359000  | -0.16638600  | 2.15568400   | H | -0.110397000 | 0.387409000  | 2.848975000  |
| Co <sup>III</sup> (H)( <sup>4</sup> -tBu <sub>3</sub> py)(prdioXH) (low-spin) |              |              |              | C | -1.150998000 | 2.074021000  | -0.684264000 |
| Co                                                                            | -0.011259000 | -0.511904000 | 0.293394000  | C | 1.163568000  | 2.100770000  | -0.552576000 |
| N                                                                             | -1.417276000 | -1.105035000 | -0.863049000 | C | -1.175998000 | 3.390405000  | -1.140541000 |
| N                                                                             | 1.482656000  | -1.077915000 | -0.761300000 | H | -2.074618000 | 1.526128000  | -0.553550000 |
| N                                                                             | 1.350804000  | -0.201350000 | 1.573927000  | C | 1.211089000  | 3.422371000  | -1.004788000 |
| N                                                                             | -1.466444000 | -0.212232000 | 1.469029000  | H | 2.080436000  | 1.576325000  | -0.317587000 |
| C                                                                             | -1.193559000 | -1.637047000 | -2.218472000 | C | 0.024613000  | 4.114628000  | -1.316100000 |
| C                                                                             | 1.372306000  | -1.592954000 | -2.137223000 | H | -2.139946000 | 3.838297000  | -1.355413000 |
| C                                                                             | 0.101766000  | -1.110946000 | -2.838030000 | H | 2.181176000  | 3.892441000  | -1.106492000 |
|                                                                               |              |              |              | N | 0.003090000  | 1.419539000  | -0.387666000 |

|   |              |              |              |
|---|--------------|--------------|--------------|
| H | -0.021462000 | -1.891192000 | 0.784450000  |
| C | -0.000164000 | 5.562709000  | -1.819909000 |
| C | 1.414863000  | 6.167006000  | -1.926717000 |
| H | 2.043790000  | 5.612153000  | -2.633938000 |
| H | 1.340825000  | 7.198865000  | -2.289062000 |
| H | 1.921788000  | 6.191846000  | -0.954240000 |
| C | -0.835682000 | 6.426142000  | -0.837133000 |
| H | -0.866333000 | 7.462522000  | -1.194559000 |
| H | -1.868697000 | 6.069255000  | -0.755598000 |
| H | -0.391080000 | 6.422406000  | 0.165474000  |
| C | -0.661347000 | 5.594188000  | -3.224158000 |
| H | -0.690529000 | 6.626596000  | -3.593192000 |
| H | -0.091266000 | 4.990031000  | -3.940473000 |
| H | -1.689987000 | 5.217066000  | -3.199238000 |

Co<sup>II</sup>(prdioH)(CH<sub>3</sub>CN) (low-spin)

|    |              |              |              |
|----|--------------|--------------|--------------|
| Co | -1.147462000 | 0.013597000  | -0.136526000 |
| N  | -1.548200000 | -1.360099000 | 1.157649000  |
| N  | -1.440108000 | 1.555712000  | 0.983905000  |
| N  | -1.070316000 | 1.353744000  | -1.495909000 |
| N  | -1.168471000 | -1.479801000 | -1.326104000 |
| C  | -1.756391000 | -1.094567000 | 2.591614000  |
| C  | -1.652441000 | 1.480712000  | 2.440017000  |
| C  | -1.069092000 | 0.198420000  | 3.042342000  |
| H  | -2.838412000 | -1.025788000 | 2.781042000  |
| H  | -1.374922000 | -1.930257000 | 3.190057000  |
| H  | -1.177560000 | 0.267232000  | 4.131366000  |
| H  | 0.004355000  | 0.142379000  | 2.828444000  |
| H  | -1.195277000 | 2.346883000  | 2.932768000  |
| H  | -2.733927000 | 1.525817000  | 2.638988000  |
| C  | -1.414885000 | -2.661495000 | -0.802300000 |
| C  | -1.654383000 | -2.569123000 | 0.653842000  |
| C  | -1.226949000 | 2.603692000  | -1.115795000 |
| C  | -1.462539000 | 2.701276000  | 0.340443000  |
| C  | -1.443725000 | -3.935276000 | -1.585033000 |
| H  | -2.445957000 | -4.381302000 | -1.576258000 |
| H  | -1.161951000 | -3.740699000 | -2.621097000 |
| H  | -0.750916000 | -4.672751000 | -1.163333000 |
| C  | -1.985084000 | -3.789740000 | 1.462718000  |

|   |              |              |              |
|---|--------------|--------------|--------------|
| H | -1.134054000 | -4.071881000 | 2.096968000  |
| H | -2.839325000 | -3.607472000 | 2.122759000  |
| H | -2.220438000 | -4.641189000 | 0.823717000  |
| C | -1.166858000 | 3.775574000  | -2.042420000 |
| H | -0.444247000 | 4.520042000  | -1.689107000 |
| H | -0.873170000 | 3.445726000  | -3.040269000 |
| H | -2.142893000 | 4.271576000  | -2.115218000 |
| C | -1.699139000 | 4.029271000  | 0.998840000  |
| H | -2.555746000 | 3.985281000  | 1.679222000  |
| H | -0.823722000 | 4.325591000  | 1.592220000  |
| H | -1.883739000 | 4.812942000  | 0.263544000  |
| O | -0.915503000 | -1.353623000 | -2.658877000 |
| O | -0.836018000 | 1.053291000  | -2.804068000 |
| H | -0.841834000 | -0.156978000 | -2.831872000 |
| C | 2.075739000  | -0.087496000 | 0.180926000  |
| C | 3.524842000  | -0.136434000 | 0.299013000  |
| H | 3.832338000  | -1.056997000 | 0.804329000  |
| H | 3.984895000  | -0.110103000 | -0.693507000 |
| H | 3.886800000  | 0.719437000  | 0.876790000  |
| N | 0.912676000  | -0.048573000 | 0.083854000  |

Co<sup>II</sup>(prdioH)(CH<sub>3</sub>CN)<sub>2</sub> (low-spin)

|    |              |              |              |
|----|--------------|--------------|--------------|
| Co | -1.365300000 | 0.024563000  | -0.121281000 |
| N  | -1.569439000 | -1.370253000 | 1.203295000  |
| N  | -1.458459000 | 1.576611000  | 1.029507000  |
| N  | -1.175050000 | 1.371599000  | -1.463466000 |
| N  | -1.276930000 | -1.481293000 | -1.294145000 |
| C  | -1.765410000 | -1.093439000 | 2.634010000  |
| C  | -1.655555000 | 1.489359000  | 2.484358000  |
| C  | -1.066823000 | 0.200324000  | 3.071990000  |
| H  | -2.846401000 | -1.011607000 | 2.824733000  |
| H  | -1.391209000 | -1.924826000 | 3.242847000  |
| H  | -1.155702000 | 0.267920000  | 4.163284000  |
| H  | 0.002010000  | 0.140886000  | 2.837256000  |
| H  | -1.199014000 | 2.350265000  | 2.986574000  |
| H  | -2.736007000 | 1.527880000  | 2.691034000  |
| C  | -1.387350000 | -2.673666000 | -0.750221000 |
| C  | -1.575570000 | -2.588144000 | 0.714474000  |
| C  | -1.195930000 | 2.624538000  | -1.063850000 |

|                                                                                  |              |              |              |   |              |              |              |
|----------------------------------------------------------------------------------|--------------|--------------|--------------|---|--------------|--------------|--------------|
| C                                                                                | -1.380292000 | 2.725629000  | 0.400211000  | C | -1.694073000 | -1.389297000 | 2.444091000  |
| C                                                                                | -1.331387000 | -3.954910000 | -1.521422000 | C | -1.626439000 | 1.189940000  | 2.611040000  |
| H                                                                                | -2.290249000 | -4.486412000 | -1.476403000 | C | -1.004447000 | -0.149003000 | 3.024477000  |
| H                                                                                | -1.102175000 | -3.746611000 | -2.567966000 | H | -2.768725000 | -1.360275000 | 2.681754000  |
| H                                                                                | -0.563205000 | -4.625599000 | -1.119127000 | H | -1.281997000 | -2.285138000 | 2.924443000  |
| C                                                                                | -1.762809000 | -3.829569000 | 1.541546000  | H | -1.067523000 | -0.218482000 | 4.117376000  |
| H                                                                                | -0.887790000 | -4.005268000 | 2.180888000  | H | 0.059057000  | -0.159689000 | 2.760574000  |
| H                                                                                | -2.635733000 | -3.739135000 | 2.196700000  | H | -1.173396000 | 1.993829000  | 3.204084000  |
| H                                                                                | -1.897927000 | -4.710903000 | 0.913883000  | H | -2.702827000 | 1.185076000  | 2.842013000  |
| C                                                                                | -1.049310000 | 3.799144000  | -1.979336000 | C | -1.489166000 | -2.520291000 | -1.126185000 |
| H                                                                                | -0.250309000 | 4.468082000  | -1.639331000 | C | -1.661310000 | -2.614906000 | 0.338818000  |
| H                                                                                | -0.813924000 | 3.455427000  | -2.988139000 | C | -1.339028000 | 2.759606000  | -0.783844000 |
| H                                                                                | -1.975377000 | 4.386485000  | -2.022172000 | C | -1.514854000 | 2.674000000  | 0.681394000  |
| C                                                                                | -1.469098000 | 4.066013000  | 1.075403000  | C | -1.539211000 | -3.687930000 | -2.060331000 |
| H                                                                                | -2.329426000 | 4.111055000  | 1.751485000  | H | -2.541419000 | -4.134484000 | -2.080400000 |
| H                                                                                | -0.569067000 | 4.258688000  | 1.674131000  | H | -1.286640000 | -3.364100000 | -3.071541000 |
| H                                                                                | -1.563719000 | 4.873239000  | 0.348396000  | H | -0.835751000 | -4.471213000 | -1.755040000 |
| O                                                                                | -1.100976000 | -1.346057000 | -2.640340000 | C | -1.947976000 | -3.932169000 | 1.002164000  |
| O                                                                                | -1.017451000 | 1.066269000  | -2.783745000 | H | -1.082896000 | -4.268978000 | 1.588746000  |
| H                                                                                | -1.044903000 | -0.146651000 | -2.807782000 | H | -2.796445000 | -3.849208000 | 1.689990000  |
| C                                                                                | 2.041683000  | -0.089788000 | 0.129975000  | H | -2.176117000 | -4.707383000 | 0.269976000  |
| C                                                                                | 3.495495000  | -0.147059000 | 0.193714000  | C | -1.320318000 | 4.038236000  | -1.560703000 |
| H                                                                                | 3.815796000  | -1.041801000 | 0.736130000  | H | -0.567220000 | 4.731330000  | -1.167907000 |
| H                                                                                | 3.916882000  | -0.179228000 | -0.815585000 | H | -1.093858000 | 3.831326000  | -2.608132000 |
| H                                                                                | 3.887357000  | 0.734938000  | 0.709338000  | H | -2.292535000 | 4.544482000  | -1.510454000 |
| N                                                                                | 0.874646000  | -0.044574000 | 0.077901000  | C | -1.734286000 | 3.908547000  | 1.509147000  |
| C                                                                                | -4.757822000 | 0.114764000  | -0.533371000 | H | -2.585622000 | 3.781837000  | 2.186587000  |
| C                                                                                | -6.200799000 | 0.147627000  | -0.727114000 | H | -0.852647000 | 4.123498000  | 2.127500000  |
| H                                                                                | -6.465871000 | -0.329534000 | -1.675462000 | H | -1.922521000 | 4.781581000  | 0.883437000  |
| H                                                                                | -6.704382000 | -0.384115000 | 0.085945000  | O | -1.084465000 | -0.980204000 | -2.823911000 |
| H                                                                                | -6.557305000 | 1.181966000  | -0.743506000 | O | -1.009712000 | 1.431113000  | -2.666231000 |
| N                                                                                | -3.599450000 | 0.087225000  | -0.378381000 | H | -1.014336000 | 0.231470000  | -2.839925000 |
| Co <sup>II</sup> (prdioXH) ( <sup>4-tBu</sup> py)(CH <sub>3</sub> CN) (low-spin) |              |              |              |   |              |              |              |
| Co                                                                               | -1.282876000 | 0.063769000  | -0.150772000 | C | 1.640468000  | -1.181554000 | -0.049874000 |
| N                                                                                | -1.541100000 | -1.476475000 | 0.983355000  | C | 1.701484000  | 1.122441000  | 0.138197000  |
| N                                                                                | -1.459048000 | 1.457410000  | 1.174126000  | C | 3.036423000  | -1.265079000 | 0.021881000  |
| N                                                                                | -1.196813000 | 1.566169000  | -1.321701000 | H | 1.047742000  | -2.082660000 | -0.155460000 |
| N                                                                                | -1.280771000 | -1.277033000 | -1.506959000 | C | 3.095443000  | 1.119248000  | 0.216085000  |
|                                                                                  |              |              |              | H | 1.154067000  | 2.056355000  | 0.183801000  |
|                                                                                  |              |              |              | C | 3.812864000  | -0.097314000 | 0.158025000  |

|                                                               |              |              |              |                                                                   |              |              |              |
|---------------------------------------------------------------|--------------|--------------|--------------|-------------------------------------------------------------------|--------------|--------------|--------------|
| H                                                             | 3.497133000  | -2.244083000 | -0.031280000 | C                                                                 | -1.587609000 | -2.589889000 | 0.728887000  |
| H                                                             | 3.607773000  | 2.070005000  | 0.320579000  | C                                                                 | -1.158369000 | 2.614693000  | -1.045324000 |
| N                                                             | 0.963504000  | -0.009788000 | 0.004930000  | C                                                                 | -1.366934000 | 2.718213000  | 0.412554000  |
| C                                                             | 5.345324000  | -0.108016000 | 0.237295000  | C                                                                 | -1.306691000 | -3.958957000 | -1.500069000 |
| C                                                             | 5.922831000  | -1.537091000 | 0.174760000  | H                                                                 | -2.260802000 | -4.499875000 | -1.465269000 |
| H                                                             | 5.665401000  | -2.040642000 | -0.765214000 | H                                                                 | -1.067682000 | -3.748413000 | -2.544087000 |
| H                                                             | 7.016207000  | -1.488289000 | 0.236288000  | H                                                                 | -0.536060000 | -4.622476000 | -1.090139000 |
| H                                                             | 5.570062000  | -2.155759000 | 1.009240000  | C                                                                 | -1.766696000 | -3.832132000 | 1.558176000  |
| C                                                             | 5.789464000  | 0.544986000  | 1.573210000  | H                                                                 | -0.886361000 | -4.006025000 | 2.190923000  |
| H                                                             | 6.884601000  | 0.548899000  | 1.635649000  | H                                                                 | -2.635540000 | -3.746061000 | 2.219335000  |
| H                                                             | 5.445518000  | 1.582253000  | 1.655460000  | H                                                                 | -1.902943000 | -4.713508000 | 0.930276000  |
| H                                                             | 5.399193000  | -0.014590000 | 2.432236000  | C                                                                 | -0.983712000 | 3.787088000  | -1.959767000 |
| C                                                             | 5.917458000  | 0.709733000  | -0.951303000 | H                                                                 | -0.178660000 | 4.444440000  | -1.610951000 |
| H                                                             | 5.567340000  | 1.748206000  | -0.937398000 | H                                                                 | -0.740228000 | 3.438525000  | -2.965063000 |
| H                                                             | 7.012969000  | 0.723310000  | -0.896708000 | H                                                                 | -1.900053000 | 4.388746000  | -2.015054000 |
| H                                                             | 5.627381000  | 0.263561000  | -1.910468000 | C                                                                 | -1.443870000 | 4.059802000  | 1.088811000  |
| N                                                             | -3.639536000 | 0.145733000  | -0.376219000 | H                                                                 | -2.306763000 | 4.116011000  | 1.760910000  |
| C                                                             | -4.800854000 | 0.181274000  | -0.514914000 | H                                                                 | -0.544086000 | 4.242492000  | 1.691102000  |
| C                                                             | -6.247003000 | 0.223884000  | -0.688091000 | H                                                                 | -1.525715000 | 4.868069000  | 0.360987000  |
| H                                                             | -6.529274000 | -0.252162000 | -1.632004000 | O                                                                 | -1.060643000 | -1.354693000 | -2.617596000 |
| H                                                             | -6.742800000 | -0.303438000 | 0.132575000  | O                                                                 | -0.952152000 | 1.055533000  | -2.760274000 |
| H                                                             | -6.596758000 | 1.260562000  | -0.700493000 | H                                                                 | -0.985493000 | -0.156409000 | -2.782888000 |
| Co <sup>II</sup> (prdioXH)(CH <sub>3</sub> CN)(Cl) (low-spin) |              |              |              | N                                                                 | -3.585335000 | 0.090165000  | -0.421805000 |
| Co                                                            | -1.363332000 | 0.018934000  | -0.106259000 | C                                                                 | -4.739452000 | 0.114449000  | -0.611138000 |
| N                                                             | -1.593196000 | -1.370237000 | 1.213893000  | C                                                                 | -6.175789000 | 0.143328000  | -0.851407000 |
| N                                                             | -1.467598000 | 1.569055000  | 1.038775000  | H                                                                 | -6.378145000 | 0.222589000  | -1.923897000 |
| N                                                             | -1.133138000 | 1.360093000  | -1.441264000 | H                                                                 | -6.641818000 | -0.771875000 | -0.473759000 |
| N                                                             | -1.256303000 | -1.484622000 | -1.272128000 | H                                                                 | -6.628053000 | 1.001586000  | -0.345251000 |
| C                                                             | -1.793266000 | -1.094954000 | 2.644131000  | Cl                                                                | 1.303323000  | -0.089203000 | 0.201963000  |
| C                                                             | -1.676900000 | 1.484786000  | 2.491860000  | Co <sup>III</sup> (prdioXH)( <sup>4</sup> -tBuPy)(TFA) (low-spin) |              |              |              |
| C                                                             | -1.092461000 | 0.196371000  | 3.084253000  | Co                                                                | -1.025491000 | -0.049991000 | -0.482531000 |
| H                                                             | -2.875066000 | -1.012598000 | 2.832683000  | N                                                                 | -1.328090000 | -1.591068000 | 0.623303000  |
| H                                                             | -1.420658000 | -1.927168000 | 3.253231000  | N                                                                 | -1.353260000 | 1.313119000  | 0.831374000  |
| H                                                             | -1.181272000 | 0.265199000  | 4.175845000  | N                                                                 | -0.877141000 | 1.464956000  | -1.640481000 |
| H                                                             | -0.027188000 | 0.133205000  | 2.836655000  | N                                                                 | -0.857491000 | -1.381409000 | -1.844938000 |
| H                                                             | -1.222360000 | 2.345560000  | 2.996639000  | C                                                                 | -1.505553000 | -1.531728000 | 2.086810000  |
| H                                                             | -2.759296000 | 1.525394000  | 2.690241000  | C                                                                 | -1.540734000 | 1.039009000  | 2.268447000  |
| C                                                             | -1.380488000 | -2.676965000 | -0.730349000 | C                                                                 | -0.885053000 | -0.274454000 | 2.700950000  |

|   |              |              |              |                                                                                |              |              |              |
|---|--------------|--------------|--------------|--------------------------------------------------------------------------------|--------------|--------------|--------------|
| H | -2.580933000 | -1.558815000 | 2.302009000  | C                                                                              | 5.241185000  | -0.041233000 | 0.544846000  |
| H | -1.043287000 | -2.416285000 | 2.540059000  | C                                                                              | 5.867148000  | -1.450189000 | 0.501104000  |
| H | -1.004171000 | -0.353423000 | 3.787665000  | H                                                                              | 5.726978000  | -1.929932000 | -0.475437000 |
| H | 0.191466000  | -0.244640000 | 2.503239000  | H                                                                              | 6.945575000  | -1.370536000 | 0.678608000  |
| H | -1.111482000 | 1.862874000  | 2.850163000  | H                                                                              | 5.452357000  | -2.105984000 | 1.276349000  |
| H | -2.618112000 | 1.002073000  | 2.471971000  | C                                                                              | 5.499047000  | 0.574353000  | 1.947115000  |
| C | -1.175660000 | -2.607587000 | -1.500239000 | H                                                                              | 6.578336000  | 0.611470000  | 2.136324000  |
| C | -1.456256000 | -2.709743000 | -0.050015000 | H                                                                              | 5.109266000  | 1.595685000  | 2.024103000  |
| C | -1.213638000 | 2.624508000  | -1.124836000 | H                                                                              | 5.033758000  | -0.031594000 | 2.733955000  |
| C | -1.498247000 | 2.514247000  | 0.324045000  | C                                                                              | 5.919676000  | 0.837742000  | -0.539770000 |
| C | -1.223047000 | -3.757558000 | -2.450980000 | H                                                                              | 5.547963000  | 1.868407000  | -0.526468000 |
| H | -2.247312000 | -4.138688000 | -2.545395000 | H                                                                              | 7.000482000  | 0.870001000  | -0.358261000 |
| H | -0.879498000 | -3.443182000 | -3.437413000 | H                                                                              | 5.752536000  | 0.424775000  | -1.541844000 |
| H | -0.593122000 | -4.583715000 | -2.103108000 | O                                                                              | -2.873521000 | -0.020579000 | -1.013275000 |
| C | -1.815966000 | -4.022158000 | 0.575186000  | C                                                                              | -3.962701000 | -0.101949000 | -0.305777000 |
| H | -0.945397000 | -4.451202000 | 1.089715000  | C                                                                              | -5.207758000 | -0.014074000 | -1.240735000 |
| H | -2.610685000 | -3.901713000 | 1.316992000  | O                                                                              | -4.134428000 | -0.226830000 | 0.922956000  |
| H | -2.146528000 | -4.742185000 | -0.173980000 | F                                                                              | -5.259466000 | 1.210217000  | -1.915972000 |
| C | -1.275921000 | 3.898327000  | -1.900973000 | F                                                                              | -5.199294000 | -1.012875000 | -2.218833000 |
| H | -0.638421000 | 4.666679000  | -1.449127000 | F                                                                              | -6.403922000 | -0.141134000 | -0.546754000 |
| H | -0.949272000 | 3.728625000  | -2.927792000 |                                                                                |              |              |              |
| H | -2.300610000 | 4.288761000  | -1.921952000 |                                                                                |              |              |              |
| C | -1.881944000 | 3.718085000  | 1.128539000  | Co <sup>II</sup> (prdioxH)( <sup>4</sup> -tBu <sub>3</sub> py)(TFA) (low-spin) |              |              |              |
| H | -2.686853000 | 3.483288000  | 1.831149000  | Co                                                                             | -1.199286000 | 0.138631000  | 0.084438000  |
| H | -1.024220000 | 4.073800000  | 1.715411000  | N                                                                              | -1.411129000 | -1.358956000 | 1.279371000  |
| H | -2.208169000 | 4.537535000  | 0.487682000  | N                                                                              | -1.263478000 | 1.568763000  | 1.374842000  |
| O | -0.537683000 | -1.063731000 | -3.117702000 | N                                                                              | -1.176569000 | 1.602787000  | -1.133842000 |
| O | -0.551041000 | 1.337295000  | -2.944457000 | N                                                                              | -1.310861000 | -1.239279000 | -1.226866000 |
| H | -0.486762000 | 0.144550000  | -3.132622000 | C                                                                              | -1.451299000 | -1.227578000 | 2.744064000  |
| C | 1.622495000  | -1.219296000 | -0.124317000 | C                                                                              | -1.317411000 | 1.347862000  | 2.828102000  |
| C | 1.605938000  | 1.098058000  | 0.037570000  | C                                                                              | -0.686153000 | 0.009542000  | 3.229551000  |
| C | 3.000183000  | -1.257014000 | 0.091805000  | H                                                                              | -2.503552000 | -1.150425000 | 3.052860000  |
| H | 1.081133000  | -2.140131000 | -0.275356000 | H                                                                              | -1.028783000 | -2.122550000 | 3.218227000  |
| C | 2.979085000  | 1.124586000  | 0.258072000  | H                                                                              | -0.661619000 | -0.027509000 | 4.325948000  |
| H | 1.049148000  | 2.021422000  | 0.014505000  | H                                                                              | 0.352053000  | -0.034194000 | 2.880404000  |
| C | 3.730955000  | -0.070461000 | 0.293192000  | H                                                                              | -0.804472000 | 2.161702000  | 3.356172000  |
| H | 3.483192000  | -2.225698000 | 0.098711000  | H                                                                              | -2.373867000 | 1.358412000  | 3.129951000  |
| H | 3.447705000  | 2.091503000  | 0.400672000  | C                                                                              | -1.537502000 | -2.462278000 | -0.795933000 |
| N | 0.914397000  | -0.059991000 | -0.153595000 | C                                                                              | -1.612301000 | -2.509488000 | 0.679098000  |
|   |              |              |              | C                                                                              | -1.287433000 | 2.811098000  | -0.624321000 |

|   |              |              |              |                                                          |              |              |              |
|---|--------------|--------------|--------------|----------------------------------------------------------|--------------|--------------|--------------|
| C | -1.355647000 | 2.769551000  | 0.851716000  | C                                                        | 5.944382000  | 0.627222000  | -1.211394000 |
| C | -1.697438000 | -3.652575000 | -1.688810000 | H                                                        | 5.623295000  | 1.675039000  | -1.196408000 |
| H | -2.712965000 | -4.062991000 | -1.620507000 | H                                                        | 7.040995000  | 0.612377000  | -1.235167000 |
| H | -1.511894000 | -3.364703000 | -2.725179000 | H                                                        | 5.575225000  | 0.169351000  | -2.137306000 |
| H | -0.999890000 | -4.452848000 | -1.415193000 | O                                                        | -3.531597000 | 0.227911000  | -0.138159000 |
| C | -1.897181000 | -3.796554000 | 1.401219000  | C                                                        | -4.465254000 | 0.313692000  | 0.730622000  |
| H | -1.007766000 | -4.146253000 | 1.942081000  | C                                                        | -5.889137000 | 0.236742000  | 0.071482000  |
| H | -2.695978000 | -3.662737000 | 2.138929000  | O                                                        | -4.434611000 | 0.448239000  | 1.988796000  |
| H | -2.198705000 | -4.584595000 | 0.710236000  | F                                                        | -6.109794000 | 1.292257000  | -0.830470000 |
| C | -1.334808000 | 4.066066000  | -1.438230000 | F                                                        | -6.068990000 | -0.945264000 | -0.666808000 |
| H | -0.550492000 | 4.769051000  | -1.133389000 | F                                                        | -6.947191000 | 0.283284000  | 0.982164000  |
| H | -1.199931000 | 3.826900000  | -2.494644000 |                                                          |              |              |              |
| H | -2.298930000 | 4.576369000  | -1.319102000 |                                                          |              |              |              |
| C | -1.513195000 | 4.028147000  | 1.657915000  | Co <sup>III</sup> (Cl) <sub>2</sub> (prdioXH) (low-spin) |              |              |              |
| H | -2.327169000 | 3.927694000  | 2.384359000  | Co                                                       | -1.386140000 | 0.018314000  | -0.146246000 |
| H | -0.597075000 | 4.247511000  | 2.222440000  | N                                                        | -1.621630000 | -1.367137000 | 1.162077000  |
| H | -1.727024000 | 4.887665000  | 1.021604000  | N                                                        | -1.510796000 | 1.555731000  | 0.998536000  |
| O | -1.197367000 | -0.986053000 | -2.563353000 | N                                                        | -1.159142000 | 1.361906000  | -1.479088000 |
| O | -1.082331000 | 1.427577000  | -2.485151000 | N                                                        | -1.263853000 | -1.478871000 | -1.319004000 |
| H | -1.113372000 | 0.226766000  | -2.619581000 | C                                                        | -1.874496000 | -1.096084000 | 2.584883000  |
| C | 1.702701000  | -1.157516000 | 0.039958000  | C                                                        | -1.767046000 | 1.468070000  | 2.444112000  |
| C | 1.818048000  | 1.150322000  | 0.131232000  | C                                                        | -1.197565000 | 0.189988000  | 3.063454000  |
| C | 3.098809000  | -1.267402000 | 0.019360000  | H                                                        | -2.962390000 | -1.019506000 | 2.727834000  |
| H | 1.085837000  | -2.048335000 | 0.010559000  | H                                                        | -1.521500000 | -1.934993000 | 3.194228000  |
| C | 3.214052000  | 1.121111000  | 0.114772000  | H                                                        | -1.346186000 | 0.256141000  | 4.147818000  |
| H | 1.290948000  | 2.096128000  | 0.175053000  | H                                                        | -0.119701000 | 0.134268000  | 2.879923000  |
| C | 3.903687000  | -0.111432000 | 0.055971000  | H                                                        | -1.333696000 | 2.335531000  | 2.953328000  |
| H | 3.536791000  | -2.257219000 | -0.026646000 | H                                                        | -2.855319000 | 1.503088000  | 2.599464000  |
| H | 3.749783000  | 2.064141000  | 0.146676000  | C                                                        | -1.379357000 | -2.668714000 | -0.778136000 |
| N | 1.052769000  | 0.029270000  | 0.094044000  | C                                                        | -1.607127000 | -2.583377000 | 0.675641000  |
| C | 5.437807000  | -0.150088000 | 0.032783000  | C                                                        | -1.186843000 | 2.610162000  | -1.075541000 |
| C | 5.983911000  | -1.591392000 | -0.032654000 | C                                                        | -1.412716000 | 2.705109000  | 0.377937000  |
| H | 5.653097000  | -2.111524000 | -0.940113000 | C                                                        | -1.294758000 | -3.946131000 | -1.550335000 |
| H | 7.079727000  | -1.563121000 | -0.046795000 | H                                                        | -2.253839000 | -4.478429000 | -1.535571000 |
| H | 5.678051000  | -2.183425000 | 0.838850000  | H                                                        | -1.032650000 | -3.736600000 | -2.588454000 |
| C | 5.981894000  | 0.525780000  | 1.319593000  | H                                                        | -0.537985000 | -4.613612000 | -1.122831000 |
| H | 7.078731000  | 0.513863000  | 1.307265000  | C                                                        | -1.816741000 | -3.820715000 | 1.500553000  |
| H | 5.658460000  | 1.569737000  | 1.400539000  | H                                                        | -0.974579000 | -3.975849000 | 2.187013000  |
| H | 5.643587000  | -0.008224000 | 2.216138000  | H                                                        | -2.725705000 | -3.739571000 | 2.105851000  |
|   |              |              |              | H                                                        | -1.903125000 | -4.707469000 | 0.872544000  |

|    |              |              |              |   |             |             |             |
|----|--------------|--------------|--------------|---|-------------|-------------|-------------|
| C  | -1.011178000 | 3.783713000  | -1.985017000 | H | 2.15233400  | 4.31394900  | -0.40109600 |
| H  | -0.225443000 | 4.452267000  | -1.615633000 | C | -0.75608700 | 4.09214800  | 0.45488800  |
| H  | -0.741377000 | 3.442616000  | -2.985624000 | H | -1.22954000 | 4.48611200  | -0.45430800 |
| H  | -1.937239000 | 4.367814000  | -2.056623000 | H | -1.51800000 | 4.08398300  | 1.24185800  |
| C  | -1.524380000 | 4.039661000  | 1.057829000  | H | 0.03227400  | 4.78570100  | 0.74847500  |
| H  | -2.417097000 | 4.086221000  | 1.690069000  | C | 0.95474200  | -4.07718400 | 0.29941100  |
| H  | -0.653036000 | 4.220236000  | 1.700458000  | H | 0.55843900  | -4.78004300 | -0.44289200 |
| H  | -1.577341000 | 4.851434000  | 0.332168000  | H | 2.03522600  | -4.00017100 | 0.16788600  |
| O  | -1.057168000 | -1.339180000 | -2.650803000 | H | 0.75538900  | -4.49860600 | 1.29245200  |
| O  | -0.968956000 | 1.059048000  | -2.785995000 | C | -2.10440000 | -3.58754800 | 0.43348700  |
| H  | -0.994876000 | -0.146722000 | -2.824546000 | H | -2.81665900 | -3.32053900 | 1.22180700  |
| Cl | -3.666012000 | 0.082209000  | -0.461368000 | H | -2.68508300 | -3.79586900 | -0.47505400 |
| Cl | 0.898888000  | -0.047960000 | 0.139627000  | H | -1.59898200 | -4.50835900 | 0.72562600  |

**Transition states:**

Co<sup>II</sup>(Cl)(<sup>t</sup>Bu<sub>3</sub>py)(prdioXH) (low-spin)(loosing Cl)

|    |             |             |             |   |             |             |             |
|----|-------------|-------------|-------------|---|-------------|-------------|-------------|
| Co | 0.00402200  | 0.00220100  | -0.17402500 | H | 2.67546200  | -0.46791400 | -0.13181600 |
| Cl | 0.09058100  | -0.00669500 | 3.50973600  | C | 0.28606800  | 1.14044300  | -3.02149700 |
| N  | 0.05397100  | 0.00451400  | -2.32015700 | C | -0.14694700 | -1.13473300 | -3.03285700 |
| N  | -0.96947300 | 1.65173800  | 0.02136900  | C | 0.32515200  | 1.17981600  | -4.41984000 |
| N  | -1.47404600 | -1.21945500 | 0.00521000  | H | 0.44616900  | 2.04499800  | -2.44725800 |
| N  | 1.00458600  | -1.61207200 | -0.02580800 | C | -0.12190700 | -1.17110400 | -4.42728700 |
| N  | 1.49470000  | 1.17756900  | -0.01571900 | H | -0.33258200 | -2.03819000 | -2.46502700 |
| C  | -2.43942300 | 1.73865300  | 0.03049400  | C | 0.11892700  | 0.00611900  | -5.17132500 |
| C  | -2.88588500 | -0.80148600 | 0.01436500  | H | 0.51760300  | 2.13033500  | -4.90216300 |
| C  | -3.09145200 | 0.54836400  | -0.67995500 | H | -0.29103900 | -2.12226900 | -4.92057900 |
| H  | -2.78123700 | 1.77988100  | 1.07573100  | C | 0.15178200  | -0.03032400 | -6.70480600 |
| H  | -2.76563200 | 2.66744900  | -0.45328800 | C | 1.28223300  | -0.99153300 | -7.16062900 |
| H  | -4.17084200 | 0.73811500  | -0.72029900 | C | -1.21195700 | -0.55287800 | -7.23030600 |
| H  | -2.73461800 | 0.49223000  | -1.71461000 | C | 0.41378900  | 1.36175900  | -7.31576500 |
| H  | -3.50587100 | -1.55821900 | -0.48191300 | H | 1.31053500  | -1.03345100 | -8.25635000 |
| H  | -3.22663700 | -0.73756600 | 1.05886800  | H | 2.25988100  | -0.64363000 | -6.80532600 |
| C  | 1.23771600  | 2.45538700  | 0.17667700  | H | 1.12563900  | -2.01059400 | -6.78898300 |
| C  | -0.21610000 | 2.71206400  | 0.21610900  | H | -2.03120900 | 0.10829900  | -6.92225500 |
| C  | 0.32748300  | -2.72745200 | 0.15573300  | H | -1.19408600 | -0.58851200 | -8.32641500 |
| C  | -1.12666500 | -2.47363600 | 0.19623200  | H | -1.43099400 | -1.56288600 | -6.86543800 |
| C  | 2.28761100  | 3.50880500  | 0.33056700  | H | -0.36976900 | 2.08027700  | -7.04494600 |
| H  | 2.24668600  | 3.95998600  | 1.32978100  | H | 1.38302400  | 1.76920500  | -7.00266300 |
| H  | 3.27680200  | 3.06984900  | 0.19078800  | H | 0.42623900  | 1.28103200  | -8.40895800 |

| Co <sup>II</sup> (Cl)( <sup>4</sup> -tBu <sub>3</sub> py)(prdioxH) (low-spin)(loosing <sup>4</sup> -tBu <sub>3</sub> py) |             |             |             |   |             |             |             |
|--------------------------------------------------------------------------------------------------------------------------|-------------|-------------|-------------|---|-------------|-------------|-------------|
|                                                                                                                          |             |             |             | C | 0.06128000  | -3.27479900 | -0.01780700 |
| Co                                                                                                                       | 0.00275600  | -0.04357500 | -0.21836100 | H | 1.30787200  | -2.81404300 | -1.72808600 |
| N                                                                                                                        | 0.09695200  | -0.35212700 | 3.27449200  | H | 2.20247500  | -3.25809900 | -0.26884500 |
| C                                                                                                                        | 1.22973700  | -0.19793500 | 4.00122600  | H | 0.07995100  | -4.35953100 | -0.18052200 |
| C                                                                                                                        | -1.07694100 | -0.31192400 | 3.95768400  | H | 0.06479600  | -3.11015300 | 1.06651300  |
| C                                                                                                                        | 1.23776500  | -0.00517500 | 5.39257300  | H | -2.08214200 | -3.33423000 | -0.24052700 |
| H                                                                                                                        | 2.16473800  | -0.23044000 | 3.44843300  | H | -1.22314200 | -2.86311200 | -1.71222200 |
| C                                                                                                                        | -1.15502000 | -0.12407500 | 5.34257800  | C | 2.63615500  | 0.75355600  | 0.06207000  |
| H                                                                                                                        | -1.98081400 | -0.43612700 | 3.36801300  | C | 2.67071500  | -0.69687800 | -0.20867700 |
| C                                                                                                                        | 0.02353800  | 0.03708200  | 6.10730700  | C | -2.65481300 | 0.66039300  | 0.08460700  |
| H                                                                                                                        | 2.19075400  | 0.10966500  | 5.89532400  | C | -2.64057200 | -0.79045600 | -0.18476900 |
| H                                                                                                                        | -2.13424300 | -0.10504500 | 5.81058400  | C | 3.84803400  | 1.60842100  | 0.25964700  |
| C                                                                                                                        | -0.05423000 | 0.24239200  | 7.62772300  | H | 4.44191900  | 1.67083600  | -0.66114100 |
| C                                                                                                                        | -0.88564700 | 1.51820000  | 7.92643500  | H | 3.54614600  | 2.61839200  | 0.54224300  |
| C                                                                                                                        | -0.75110100 | -0.98690600 | 8.26939300  | H | 4.49692800  | 1.20160900  | 1.04381100  |
| C                                                                                                                        | 1.34051900  | 0.40511500  | 8.26635900  | C | 3.97725900  | -1.42799100 | -0.34501400 |
| H                                                                                                                        | -0.95323600 | 1.67053500  | 9.01086500  | H | 4.10142000  | -2.16201900 | 0.46144300  |
| H                                                                                                                        | -0.41530800 | 2.40506000  | 7.48408900  | H | 4.02382300  | -1.97273300 | -1.29461300 |
| H                                                                                                                        | -1.90604200 | 1.44094900  | 7.53374400  | H | 4.82382100  | -0.74212400 | -0.30537900 |
| H                                                                                                                        | -0.18029800 | -1.90431600 | 8.07943000  | C | -3.89415500 | 1.47277300  | 0.29082400  |
| H                                                                                                                        | -0.82391600 | -0.84694800 | 9.35513400  | H | -4.52035300 | 1.04656800  | 1.08308600  |
| H                                                                                                                        | -1.76567800 | -1.12860300 | 7.87960200  | H | -3.62519500 | 2.49394700  | 0.56649200  |
| H                                                                                                                        | 1.96555800  | -0.48319400 | 8.11195000  | H | -4.49887000 | 1.51034200  | -0.62419100 |
| H                                                                                                                        | 1.87174800  | 1.27766100  | 7.86633800  | C | -3.92153500 | -1.56740300 | -0.30918800 |
| H                                                                                                                        | 1.23077200  | 0.54993200  | 9.34766600  | H | -3.95358400 | -2.12081300 | -1.25428300 |
| Cl                                                                                                                       | -0.02200200 | 0.40419700  | -2.70215900 | H | -4.01600300 | -2.29907900 | 0.50351600  |
| N                                                                                                                        | 1.49088700  | -1.26156300 | -0.33411800 | H | -4.79133600 | -0.91121300 | -0.27023300 |
| N                                                                                                                        | -1.44267500 | -1.31388000 | -0.31873000 | O | 1.16577500  | 2.53353300  | 0.32184300  |
| N                                                                                                                        | -1.43616600 | 1.15800700  | 0.10925200  | O | -1.24538100 | 2.49049300  | 0.33307500  |
| N                                                                                                                        | 1.40117800  | 1.20837200  | 0.09578300  | H | -0.04042900 | 2.61377100  | 0.33757700  |
| C                                                                                                                        | 1.33825100  | -2.69248200 | -0.63516100 |   |             |             |             |
| C                                                                                                                        | -1.24323200 | -2.73933500 | -0.61931200 |   |             |             |             |
